# Supplementary material
Source: PubMed Central journal article supplement (PMC2861532)

**Supplementary Figure. Comparison of minor allele frequencies for *LPA* markers between European-American and African-American samples.** The numbers on the X-axis represent the minor allele frequency observed in the African-American sample (n=24). The numbers on the Y-axis represent the minor allele frequency observed in the European-American sample (n=23). A total of 275 SNPs, represented by circles, were compared between the two samples. The number of circles on the graph does not equal the number of total *LPA* SNPs because many SNPs have the same estimated minor allele frequency.

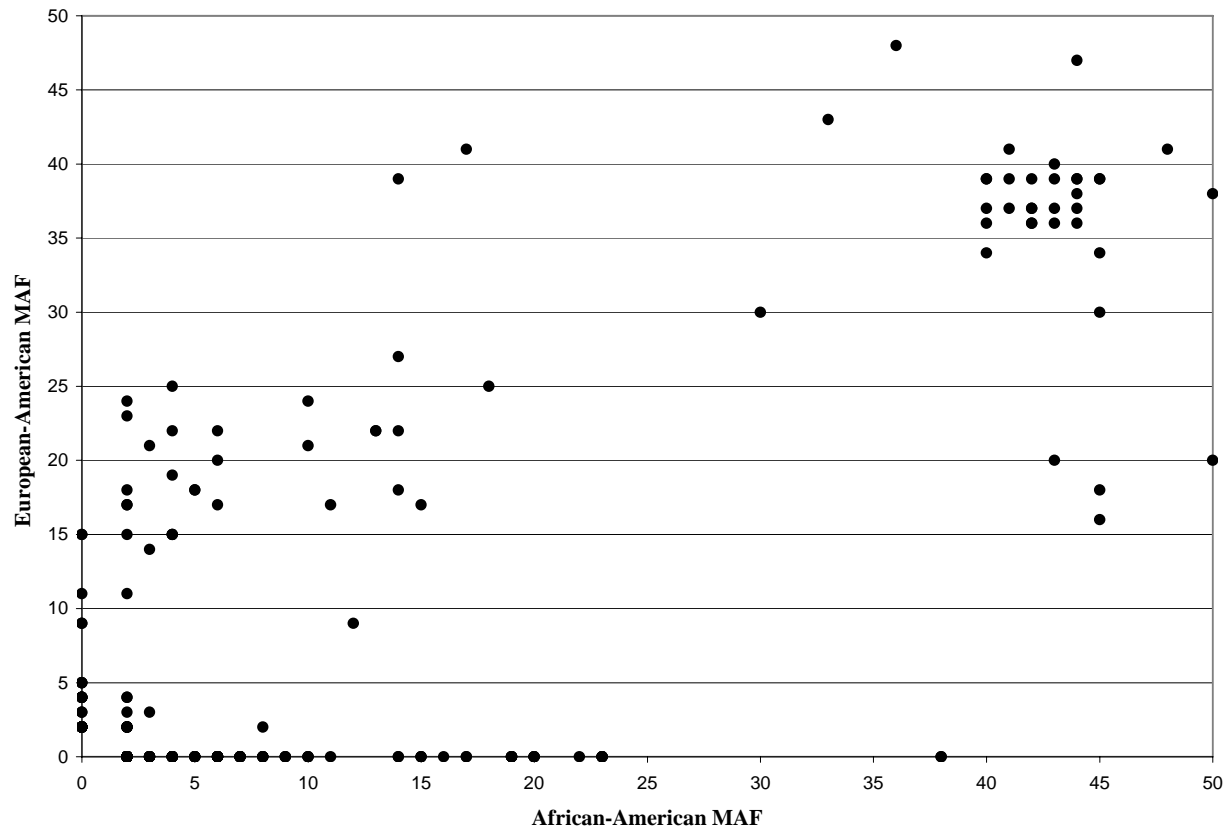

Supplement: hhe0066-0199-s01.pdf [file hhe0066-0199-s01.pdf]
