# Supplementary material
Source: PubMed Central journal article supplement (PMC2861532)
Supplement: hhe0066-0199-s03.pdf [file hhe0066-0199-s03.pdf]

**Supplementary Table 1. Location, rs number, and sequence context of SNPs in *LPA*.** SNPs are numbered based on the GenBank accession number DQ452068.

| SNP (alleles) | Location within gene | rs #      | 50 bases 5 flanking the SNP                          | 50 bases 3 flanking the SNP                          |
|---------------|----------------------|-----------|------------------------------------------------------|------------------------------------------------------|
| 275 (G/A)     | 5 flanking           | -         | gcttagtaaatgatgactattctttttattgcaataaaatgtacacagc    | taagagtactattttaaccattttgcagggtaccaccaagtgccattt     |
| 421 (A/T)     | 5 flanking           | rs783148  | ttttctcatccccaaggaacctcatgctcattaatcagtagctctcc      | ttaaaAtattagttatgaagatcatagcactatacaaaactcattatgta   |
| 427 (A/G)     | 5 flanking           | -         | tcatcccaaaaggaaacctcatgctcattaatcagtagctctccAttaaa   | tattagttatgaagatcatagcactatacaaaaactcattatgtaaatggtg |
| 850 (C/T)     | 5 flanking           | -         | catcaccactgctctgttctctggagtttcttgtgaacatgttggtgga    | gtagttaccatttcttcatcttttaaacacaggtaccttggggctgg      |
| 1372 (G/A)    | Intron               | -         | tgattttctggtaggggaaggaggtagagggtacaggacagagactaact   | cacacaatatctgagactggagctcagatattgctgatgatcagagttgg   |
| 2130 (A/G)    | Intron <sup>1</sup>  | rs1800589 | gagtgcaatgacacattcttggctcactgcaacctccatctctgtgttc    | agcaattctagtgccctcagcctacttagtagctgggatgactggcatgTg  |
| 2179 (T/C)    | Intron               | -         | cAagcaattctagtgcctcagcctacttagtagctgggatgactggcatg   | gctccacaccagctaattttgtattttttagagacagggttttgg        |
| 2810 (G/A)    | Intron               | -         | cAagcaattctagtgcctcagcctacttagtagctgggatgactggcatg   | ggggaaatggcttcaccacttCccagcatctattgacattgactctca     |
| 2833 (C/T)    | Intron               | -         | gggggtgagggaaggagtaaggagacataaaaggcaatgtggagcagctgag | ccagcatctattgacattgcactctcaaatatttataagactctatatt    |
| 2995 (C/T)    | Intron <sup>2</sup>  | rs1853021 | aatttgactatctggttgggtgcgtttactctcatgtaagtcaacaa      | gtcctgggattgggacacactttctggGcactgctggccaatgccccaaat  |
| 3023 (A/G)    | 5 UTR <sup>3</sup>   | rs1800769 | ttactctcatgtaagtcaacaaCgtcctgggattgggacacactttctgg   | actgctggccagtcacaaaatggaacataaggaagtgttcttctactt     |
| 3170 (A/T)    | Intron               | rs2315129 | gaattatttttctcccacaatgtagtaaaaatacatatgcatggctt      | tgtgcaattcattaatttttgattcatgaaattcccagttcaaaatctt    |
| 3264 (C/G)    | Intron               | -         | gaattatttttctcccacaatgtagtaaaaatacatatgcatggctt      | gtgaagactgtcacggtgctggaatgaatgggcagaaaaataatggttgg   |
| 3265 (-/+)    | Intron               | -         | aatcttgatatgattgaaaaattcttaaaaaataagtttaattccccC     | tgaagactgtcacggtgctggaatgaatgggcagaaaaataatggttga    |

|               |        |           |                                                             |                                                         |
|---------------|--------|-----------|-------------------------------------------------------------|---------------------------------------------------------|
| 3414<br>(G/T) | Intron | -         | aaaataaatagccattgtagctaactatgcaaaggatg<br>gctaagctcttc      | cttggttctcagtttcattaatttatatcatctctgttcaggtgcc<br>atgc  |
| 3648<br>(C/T) | Intron | rs9346833 | gcttcttatccctggagaaattatacacatccattgcc<br>gatgatatac        | catataatgattcaacaataactcagggattttgtgAgtgg<br>gttaggtc   |
| 3686<br>(A/G) | Intron | -         | cagatgatatacGcatataatgattcaacaataactca<br>gggtattgttg       | gtgggttaggtccccacattttatacacatacacacatac<br>acaccgt     |
| 4134<br>(C/T) | Intron | rs1321195 | tttgcttcaaagctagcttaggggaagaaatgcagca<br>gtcctgccgtac       | acttcactttaggagcagaaagtggcacttttaaaggCaa<br>cagaggagg   |
| 4173<br>(C/G) | Intron | -         | tctgcccgtacCacttcactttaggagcagaaagtgg<br>cacttttaaagg       | aacagaggaggcgagcaaggattcaggggtccatgctag<br>cttgggcacct  |
| 5443<br>(C/T) | Intron | rs1367209 | TATTAATTTATTGTGTGTTTTGAA<br>GTCACACTGTGAGCTATAGAATT<br>TAC  | CAAGCACAACCTCTTCCTGGAAAAGA<br>GAGTTCAAATGAGAAACAGTGCAGG |
| 5491<br>(A/G) | Intron | rs1367210 | ACTCAAGCACAACCTCTTCCTGGA<br>AAAGAGAGTTCAAATGAGAAAC<br>AGTGC | GGGTGAAGACATGGAtatgggcctaaaatatac<br>tatttctcaatgatatt  |
| 5595<br>(G/A) | Intron | rs1367211 | tatatctatcaagtcttttagtggattaggttcagaatg<br>catcagcca        | tgctgttcaataatccagtttccagcatagagcatatataat<br>tgagga    |
| 5829<br>(A/G) | Intron | rs1652507 | gagaatgagaatctgttcatctgccttctactggatact<br>tgtcatcggc       | tacaacacatgttctctgcagtgtgcatcttcagaacctc<br>ccctgac     |
| 6448<br>(A/G) | Intron | rs1321196 | ctccccactaatagtggtgtgctactgtagtaagccta<br>gtacaaaaatg       | ccttctttgtggaggagcttcatactcctcattttttttgcttaa<br>ttt    |
| 6755<br>(C/T) | Intron | -         | atcaatcttggcaacacagttgccactgatggtgtctta<br>ttttttTat        | atgacatggcaatcaagagcaaacatgattattctatttaa<br>gatttta    |
| 6867<br>(G/T) | Intron | -         | ggcagatagctagatatgagcaggaggtggaagccc<br>ctgagagaatggag      | tctggagaatctgaaacccagagattaccaagtcctgca<br>tgctagaca    |
| 6960<br>(C/T) | Intron | rs1740428 | gctagacatgagtgaggagggggaatacctaggta<br>gaaaagaatgcccc       | taagatgccagcagtcgctcactgtgcagttaactttcag<br>aatgctgc    |
| 7498<br>(G/T) | Intron | -         | tgtagctgccttatggaaaagtggccacactgtttctg<br>cactggctcct       | ccctactattcctcactgggcagagcaCagccacctgg<br>ccctgctga     |
| 7527<br>(C/A) | Intron | -         | ctgtttctgcactggtcctGcccactattcctcact<br>gggcagagca          | agccacctggccctgctgaacattttagtcagtggtgct<br>ctgtgctt     |
| 8870          | Intron | -         | caaatctgctaagattgccctgaatgagagtttaactc                      | agttgaaatttgaaaaaacagagacaagctgttatcatgc                |

|                |        |            |                                                            |                                                            |
|----------------|--------|------------|------------------------------------------------------------|------------------------------------------------------------|
| (G/A)          |        |            | ctgtagagaaa                                                | gagtagctg                                                  |
| 8894<br>(-/+)  | Intron | -          | tgagagtttaactcctgtagagaaaGagttgaaattgt<br>gaaaaaacaga      | caagctgtatcatgcgagtagctgatctgcaacaagaggt<br>gcatgcaca      |
| 9101<br>(C/T)  | Intron | rs9456573  | cactgagtttgtaactctgatgaaactttttgccagaa<br>gaaacagttt       | cccatccccagtagtggtaacatccccctccctgacccgtgc<br>tgccattag    |
| 9537<br>(C/T)  | Intron | -          | ttattggtttggcCCTACTaagtagggattctgcat<br>ttaatgtTGCAGCT     | GGGGACTTAGAAAAGGTTCTGATAG<br>GGCCGGGAGCAGTGGCTCACGCCTG     |
| 10057<br>(C/A) | Intron | rs1830522  | AGACCTACTCATCCCAGCTGGGA<br>GGGTCCAGAAGATACACCCTTGG<br>CCGA | GCTTTGTGAAATAGATTTGTGAGAG<br>CAGCACCTGTATTTTTGAAGAGCCC     |
| 10270<br>(C/A) | Intron | rs2872764  | TGGCACTGAACCATCAAAGGCAA<br>GGTGGGCATAACTACCATAATAG<br>ACAG | AGAGGCAAAGCAGCCATCAGAATA<br>GTCTGACTCATGTAGAGCTCTGGCA<br>T |
| 12566<br>(A/G) | Intron | -          | ttagattatggactcacatcagcatttaagcatttaagt<br>gttgttcat       | tcagcatttaaatattgtaacctatgtaataacttttggttgg<br>ggt         |
| 12742<br>(G/C) | Intron | rs9457988  | aagattatgtatgattcaggatgtgtgatgggttcaag<br>ttgacaagga       | ttgacttgtgatggtaataactgtcaactgattggattgaaa<br>gatgca       |
| 15845<br>(A/G) | Intron | -          | tatcttaaatgcaccacaggttaaatctctccagtgatg<br>ggttgctgct      | tcttttgcttagagtggggcctgggggtggaagaattttctc<br>agtgttc      |
| 15960<br>(T/C) | Intron | rs2983236  | atcttagcagtcactgcatgcctgcactaca<br>gaggggatctctcataca      | ataatctaaccctgaaactgctgtttctcttaaatgaatgct<br>caatc        |
| 16165<br>(C/T) | Intron | -          | ttggatggaactgaacctgtgggtgggttgagagaga<br>aagagtagcaga      | gtctgctatgttgaatgcaggatgctgggcacaagaaaat<br>ttccagtct      |
| 16309<br>(C/T) | Intron | rs12212507 | aagtgaagggctttgcctgcggtgctagatgcaaaac<br>cattttctcccc      | cattgccagaaacttaaggctttggctttctgagcagtggt<br>ctaggga       |
| 16935<br>(C/T) | Intron | -          | atcaacataataggaccacagaaaactacccaaatgc<br>gtagtcattaat      | ttacagtaagcaaaacaaggtccaagtaaaattgtcttaga<br>aaaggtgt      |
| 17079<br>(T/A) | Intron | rs1569933  | aatgcatggcaaatgtctgagaacattactttgagc<br>aaagagtagat        | gaagagaaatgtaagctggctctcttctctgagagtttgata<br>aaatcag      |
| 17638<br>(G/T) | Intron | -          | CCGCTTGTGGACAATAGATGGT<br>AGAGGACCAAGGGAATTGCGAG<br>AGAGA  | AACAATGAGATCAACTCAACAGATG<br>CACTGGTTTTCTTCCTGGAGACCCT     |
| 17762          | Intron | rs7756317  | GGAGCCCAAAAAAACTGTAGC                                      | AGTTTGGGATTATTCAGGTGGCTAG                                  |

|                |        |            |                                                             |                                                            |
|----------------|--------|------------|-------------------------------------------------------------|------------------------------------------------------------|
| (G/A)          |        |            | CATCTTGCTGAACAGAGGAGGGA<br>CATTG                            | GATTTTCTAGGCCTGCTAACAATGA                                  |
| 17836<br>(G/A) | Intron | -          | AGGATTTTCTAGGCCTGCTAACA<br>ATGAGAACAGATTTGTGGAGGA<br>AAGGA  | TTCTAGAAATATGCATAGAAATCTC<br>CTCGAGTCATTGGCTAAACATGAAG     |
| 18273<br>(C/T) | Intron | -          | atcttagaggtaaacatcaaagcaagtggctcagct<br>atgcagtatcca        | agtgtgaggcctaaatataaaacttgactacacatagaaac<br>cttttagtg     |
| 18339<br>(A/G) | Intron | rs10945683 | tataaaacttgactacacatagaaccttttagtgtgac<br>ccacaagcagg       | ggaaaatcagTcaatacaaacagaccagaagagacag<br>aatgattagaa       |
| 18350<br>(C/T) | Intron | rs10945682 | actacacatagaaccttttagtgtgacccacaagcag<br>gAggaaaatcag       | caatacaaacagaccagaagagacagaaatgattagaa<br>Tggcataaaaa      |
| 18390<br>(T/G) | Intron | -          | ggaaaatcagTcaatacaaacagaccagaagaga<br>cagaaatgattagaa       | ggcataaaaatttgacatatcactatataataattgagttctag<br>gattta     |
| 18638<br>(T/A) | Intron | rs7770685  | ataccaaataaaaaataattgcatagaacctacagaac<br>cagatacacaca      | acaaaacacacgcatgcatacacacacactcaaacatgtat<br>aagcttaca     |
| 18765<br>(A/T) | Intron | -          | gaaaaatgaaatcaaccgagccacacagacataaag<br>gaaaacataaaaag      | ttcctacatgtgggaagcaagtcacagaaagggggaagg<br>agattggaac      |
| 19001<br>(C/T) | Intron | rs9457986  | atagcagttcaactgtcagaggcacaagacataatac<br>acagaaaaatctc      | taaggaacgggaaaaacaaaagctgtgtcttgctagagg<br>aacagtgata      |
| 59549<br>(G/A) | Intron | -          | ccagttcctggaatggagggtctgggattgacacta<br>ggccacatgtata       | agtctctagagagaCnAgtgtTTCATCCCCATG<br>GCCCCGTAATACATTTCC    |
| 59564<br>(-/+) | Intron | -          | ggagggtctgggattgacactaggccacatgtataG<br>agtctctagagaga      | gtgtTTCATCCCCATGGCCCCGTAATAC<br>ATTTCCCATTTTCTCAGGCAGCC    |
| 59625<br>(T/C) | Intron | rs9457952  | TCCCCATGGCCCCGTAATACATTT<br>CCCATTTTCTCAGGCAGCCACAG<br>GTCA | GAATGTGAGGATAGAGAGAGGTTG<br>GAGCAACGTTCTTGGGAGGCATAAG<br>G |
| 59742<br>(C/T) | Intron | -          | AGATCCCCGCAGCCCCAAACTCCT<br>ACCTGCTTTGCCCCCTAATGCAG<br>TGTT | CTCCGTAGCTGTCCGACCTCTTCAGA<br>TCTCTTAGTCTACCCTGCCATCTT     |
| 60464<br>(G/C) | Intron | rs9457951  | agtatgagaaatgtgcagacaggattagtgtgagaga<br>gccatttgtgctt      | tggcaatcatatggactttatgggaatattagaaggcact<br>ggtaatg        |
| 60672<br>(A/G) | Exon   | -          | gcaggaaatccagatcctgtggcagccccttattgttat<br>acgagggatccc     | gtgtcaggtgggagtactgcaacctgacacaatgctcaga<br>cgcagaaggg     |

|                |        |            |                                                             |                                                        |
|----------------|--------|------------|-------------------------------------------------------------|--------------------------------------------------------|
| 60814<br>(T/C) | Intron | -          | agaggtccttctgaacaaggtaaggagcctgtggcc<br>agaaacctacacg       | ttcgatgctgggatgaaaagccatggaaattcccactgatg<br>cagcagcct |
| 60869<br>(T/C) | Intron | rs10081128 | atgctgggatgaaaagccatggaaattcccactgatg<br>cagcagcctccaa      | ggtaaacggatgctcgagtgttgactgagttctgtcatgtag<br>gaggaagc |
| 61046<br>(G/T) | Intron | -          | acaaccctccagggtgatcgacttcacaactcacct<br>cgttgaaaaatgg       | ctatctcagtgtcttagccaaaattttattgtaacatgctgtc<br>AGATGT  |
| 61095<br>(G/A) | Intron | -          | gGctatctcagtgtcttagccaaaattttattgtaacat<br>gctgtcAGAT       | TGTGACTCTTTCCAAGCCAGTAAGC<br>TTTTCTGGGACTTCTTCAATTAGC  |
| 61284<br>(A/G) | Intron | -          | GCATTAATTCCAAATCACCCCTGG<br>TTCTATGGAGCAGTACATGAACT<br>CCCA | TGATCTATGTTTCAGGACTTCCTCAG<br>TCATAGGTGGGCTCTGCAGCCCTA |
| 61288<br>(T/C) | Intron | -          | TAATTCCAAATCACCCCTGGTTCT<br>ATGGAGCAGTACATGAACTCCCA<br>ATGA | CTATGTTTCAGGACTTCCTCAGTCAT<br>AGGTGGGCTCTGCAGCCCTAGGTT |
| 61528<br>(C/T) | Intron | -          | GCTGTTCGCCTCCACCCATCCCT<br>GATAACTGAAGTGTCTTTGTCTG<br>CAGT  | CTAGACGAAGGACTGTTGTCTCTCC<br>CATGGCCCAGAAGCTGAAGACCTTG |
| 61656<br>(T/A) | Intron | -          | TCATGTCTGTCCGTTTCTCTGCCC<br>CTAACACCCAATCACCATGTATG<br>GCC  | GTACCCCCAAATGCATCGTGCTTTG<br>CTGTTTGCTGCCCCATAGTCCTCAT |
| 61673<br>(C/T) | Intron | -          | TCTGCCCCTAACACCCAATCACCC<br>ATGTATGGCCTGTACCCCCAAAT<br>GCAT | GTGCTTTGCTGTTTGCTGCCCCATAG<br>TCCTCATGAACATTCAGTAGAAAT |
| 61777<br>(T/C) | Intron | rs6932014  | CATAAATGTGCTTGCACGTGAGC<br>ACAGTTTCCATTGAGAAGCCCTC<br>TCAT  | TGTCCTTTTTTTCTAAGCTTTTATGT<br>GAAatatttctaagaacttactac |
| 62580<br>(G/A) | Intron | -          | cttttctccttgaattctattaaactaaactccaattcct<br>gaagtgaag       | ttctgttggggtttctgtttggcttacaaggaaagtatatatg<br>tatat   |
| 62745<br>(A/G) | Intron | rs6930542  | ggttctgaccaccagtggctgaagggatactggtgtg<br>tagagaataaaa       | tggcaggaaggcagatgagagtcagcaagagagagat<br>cctgtaaagtaa  |
| 62850<br>(A/C) | Intron | rs6930342  | gtggatagatggacagaagcccaggtctgaccagcc<br>catggccaggcttt      | ggccataagtacaccaaagacatggaaaaatggtttctac<br>atgttggac  |
| 63004          | Intron | rs6902102  | tccatagataccttggctttcttctgagggcccttcttg                     | aaggtgatggagcccagatggactgtagccatcttctgaa               |

|                |        |            |                                                         |                                                       |
|----------------|--------|------------|---------------------------------------------------------|-------------------------------------------------------|
| (C/T)          |        |            | cactgaagag                                              | tgcaggaga                                             |
| 63444<br>(G/A) | Intron | rs9365179  | agtagaattagtaaatttctagaaaaaaagcagctct<br>agacaaaccctg   | caaaactgaaaagcaagctccaagcattaaaatcattcca<br>agtcaatt  |
| 63544<br>(G/C) | Intron | -          | taactgctgggagaggaaaaccctcttagaggtaa<br>acaacaaagtcaa    | tggctcagctatgtgggttcacagtgtgagttctaaattaa<br>aacttga  |
| 65869<br>(A/G) | Intron | rs13192132 | acgtcaaaatccataaccagttattccagagagatggat<br>tgggcagaaggc | gaaggaggatattctgatcccttttggccacatgtatgtata<br>atctcag |
| 66185<br>(G/A) | Exon   | -          | tgatgtgattcttttgaattccagtggttgatcaaga<br>actactgcc      | aaatccagatcctgtggcagccccttgggttatacaacag<br>atcccagtg |
| 66419<br>(C/G) | Intron | rs7752408  | ctgcttgatgctgggatgaaaagccatggatacccc<br>cactgacgcacaa   | ccttcagtgtacactggttctcgtgtgttgggtctgggtctgc<br>catgtg |
| 66636<br>(G/A) | Intron | -          | ccctcattgtaaaggggctatctcattgtcctagaca<br>aaattcttatt    | taatatgCtgtcagatgtgtgttcttccaagccagtaaact<br>ttccag   |
| 66644<br>(C/G) | Intron | -          | tgtaaaaggggctatctcattgtcctagacaaaattctt<br>attGtaatatg  | tgtcagatgtgtgtcttccaagccagtaaactttccagg<br>gatttct    |
| 67247<br>(C/A) | Intron | -          | tctcccaaaaaaccattttaatgcttgagacttgctt<br>ttcagctttg     | caaatgcatcacccttctctatgctgttccatgctgcatga<br>acactc   |
| 67555<br>(C/A) | Intron | -          | tctcagtgactctttttggtttatgcatataatggcttct<br>gtatttt     | tgttctagaaataataagcttgatgtcttctgttttaattcag<br>cactg  |
| 67766<br>(T/C) | Intron | -          | gacaccacaccagcatagtcggaccccagaa<br>aactacccaaatgcgtacg  | ctttgttcttaccataagcGaaggaaggccaatggaagt<br>ttctgttag  |
| 67787<br>(G/A) | Intron | rs7450261  | gacccagaaaaactacccaaatgcgtacgTctttggt<br>ctttaccataagc  | aaggaaggccaatggaagttctgttagaagagtcatgct<br>tcaaggtga  |
| 67875<br>(A/G) | Intron | -          | tgcttcaagggtgactgctcaggactcaacttggtcag<br>atgcagaggaac  | tttctgtgagcAaaagttcttagagaaGactttgttttttga<br>gacaga  |
| 67888<br>(A/C) | Intron | rs7767342  | ctgctcaggactcaacttggtcagatgcagaggaac<br>Attctctgtgagc   | aaagttcttagagaaGactttgttttttgagacagagcttg<br>ctttgtt  |
| 67904<br>(G/T) | Intron | rs7743535  | ttggctcagatgcagaggaacAttctctgtgagcAa<br>aagttcttagagaa  | actttgttttttgagacagagcttctgttggcccaggctg<br>gagtg     |
| 67985<br>(C/T) | Intron | -          | tgttcccagggtggagtgcagtggcatgatctcggc<br>tactgcaagctc    | gcctcccgggttcacaccattctctgcttcagcctctctag<br>cagctggg |
| 68134<br>(C/T) | Intron | rs9457948  | agagacagggtttactgttctagccaggatggtcttg<br>gtctcctgacct   | gtgatccgctgcctcagcctcccaaagtgtgggattaca<br>ggcgtgagc  |

|                |        |           |                                                        |                                                        |
|----------------|--------|-----------|--------------------------------------------------------|--------------------------------------------------------|
| 68363<br>(A/G) | Intron | -         | agttagagtatccttctacaacatcggtgagggttaat<br>acaaccttttc  | ccttggaaattctatcattctaaactctagtcctgaagtgaat<br>gttgtgt |
| 68426<br>(T/C) | Intron | rs6926458 | atcattctaagctctagtcctgaagtgaatgtgtgttg<br>gccttttgca   | cttgggtcaCaggaattgatacttgacatctatggagag<br>gcaaatctt   |
| 68436<br>(C/G) | Intron | -         | gctctagtcctgaagtgaatgtgtgtggccttttgca<br>Tcttgggtca    | agggaattgatacttgacatctatggagaggcaaatctttt<br>ctatcta   |
| 68510<br>(A/G) | Intron | -         | atggagaggcaaatcttttctatctactcttttcaatg<br>ggtacaaac    | cacttggctctgagcaccagtggctgaagagatacggct<br>gccagagg    |
| 68581<br>(G/A) | Intron | -         | tgtctgaagagatacggctgccagaggagaaga<br>acaaggcaggaaa     | Cagatgagagtcagcaaggggcgatgctgaaaagtaa<br>aggggcgggta   |
| 68582<br>(C/A) | Intron | -         | ggtctgaagagatacggctgccagaggagaagaa<br>caaaggcaggaaaG   | agatgagagtcagcaaggggcgatgctgaaaagtaaaa<br>ggggcgggtag  |
| 68700<br>(C/T) | Intron | -         | tctggccattctatggccagtcttcggccataagtga<br>taccaaagaca   | ggcaaacggttccacatgtgaacaacagatgctagag<br>gaccaagagt    |
| 68810<br>(C/A) | Intron | -         | gggagaaaatgagatcaacctcaatgccttgcttt<br>cttcaaggagac    | cttctgactgaagagcaaggagatggagcccaagctga<br>cTgtagccat   |
| 68852<br>(T/G) | Intron | -         | aaggagacCcttctgactgaagagcaaggagat<br>ggagcccaagctgac   | gtagccatgttctgaacagaggagagtgattggacttgg<br>gattactca   |
| 70563<br>(-/+) | Intron | -         | gaaacctgaggaccttgagtacctcagagacagtc<br>catgagggttaaag  | acttggctacgtgaaaagtaagatgctattggccttttactt<br>cattt    |
| 70708<br>(G/C) | Intron | -         | taatggcatcatgtctctgatggctaagaaaatgggca<br>attgttgacttt | tgtgttaaaaaattctcagtggtggtttcttatactataatatt<br>catc   |
| 70841<br>(A/G) | Intron | rs6913833 | cccctatgaacaaagactttgacagttggtg<br>atctaagaccacagcttaa | tatctacacaagaaaaaaaaaaaaagcaataagagccaa<br>ggaaagcaga  |
| 71101<br>(T/A) | Intron | -         | caccatctggagtaacagaggagaggtgccattacta<br>tagcatcttcag  | tctgaaagctgaaaagaagattttgagaacaattgtatgtga<br>ataaattc |
| 71172<br>(C/A) | Intron | rs9456552 | ttttgagaacaattgtatgtgaataaattcaggaatgta<br>atcatgtggg  | caattcctgaggaagacaacaatcagcaaacagatgct<br>gaatagttag   |
| 71624<br>(-/+) | Intron | -         | agttgaggaccattgtgcatattatgggaccttagtg<br>aaaatattcA    | gtctcttttacactttgttacagcaaaatgtagaggcgcta<br>agtgcc    |
| 71918<br>(A/G) | Intron | rs7745744 | tgtcccagatccaagcacagaggcttcttctgaaga<br>aggtaggaagtct  | tggccagacaaccacacctaggacgttgggatgaaaag<br>agttgcaaat   |

|                |        |            |                                                         |                                                          |
|----------------|--------|------------|---------------------------------------------------------|----------------------------------------------------------|
| 72283<br>(A/G) | Intron | rs6907156  | ccaagctcatgataagcctttcatggtatttctcaagta<br>gtcagtggtc   | ttgcatctttggctttgCggtttcggaggaatgcggttttga<br>gtctgtc    |
| 72301<br>(C/T) | Intron | rs6921912  | tttcatggtatttctcaagtagtcagtggtcAttgcatct<br>ttggctttg   | ggtttcggaggaatgcggttttgagtctgtcatccttgagaa<br>acctaata   |
| 72373<br>(T/A) | Intron | -          | ttgagtctgtcatccttgagaaacctaataatgacttttctt<br>agttccata | acttctgggtccaggtagcagtacatagccaacaataatgctc<br>catcgttct |
| 72530<br>(C/T) | Intron | rs6921516  | ctcagtggttctgccctccttctcatggaacatataatct<br>gtgttggtct  | tgagaagAagagtagtgatctactttgttgaatgcag<br>aatcctggg       |
| 72538<br>(A/G) | Intron | -          | tcttccccctccttctcatggaacatataatctgtgttggtc<br>tCtgagaag | agagtagtgatctactttgttgaatgcagaatcctggg<br>cCaaagat       |
| 72582<br>(C/G) | Intron | rs12182517 | gagaagAagagtagtgatctactttgttgaatgc<br>agaatcctgggc      | aaagataaccagccatccctcaagggaataaaatttggcc<br>agtagccct    |
| 72679<br>(C/T) | Intron | -          | ccctctctgagagacaattgtctttgcctacagagtctct<br>agatgcaggac | gcttctgccccatcttcaagaagctgaaggctttGgctttg<br>gaggatca    |
| 72715<br>(G/A) | Intron | -          | cctagatgcaggacCgcttctgccccatcttcaaga<br>agctgaaggcttt   | gctttggaggatcagcagcttagggaaatgtgtgacggttt<br>catgtctgt   |
| 72886<br>(G/A) | Intron | -          | ttctcaggaacaccagaagatgtctatattaaagagc<br>atgcacatgagt   | caatttgactgataggcactctgatctttcctttggtgcctgt<br>gtttta    |
| 72991<br>(T/C) | Intron | -          | aaatctttctaagaactcgttaaagtctagaatgctatg<br>aatctttggg   | tttattattggtatgtccatctgctgctagtacagaacagag<br>catggta    |
| 73120<br>(G/T) | Intron | -          | cagtcacagatttctctgatgcttctgtgttctagaat<br>actcagctt     | atttctcctctttgaattcagcaccaacggagcaaaagcccc<br>gggggtcca  |
| 73516<br>(A/G) | Intron | -          | gaaatgtcaggccagctctcttttctcatagttgacaga<br>agcaggaggat  | tttgaaggtggtgaGttctcatgaAtagaaagctcaggac<br>acatggccac   |
| 73531<br>(G/A) | Intron | -          | ctctcttttctcatagttgacagaagcaggaggatAtt<br>gaagtggtga    | ttctcatgaAtagaaagctcaggacacatggccacgtgctt<br>agaaatagc   |
| 73541<br>(A/G) | Intron | -          | tcatagttgacagaagcaggaggatAttgaaggtgg<br>tgaGttctcatga   | tagaaagctcaggacacatggccacgtgcttagaaatagc<br>accattccac   |
| 73608<br>(C/A) | Intron | -          | catggccacgtgcttagaaatagcaccattccacaatg<br>cccactaaagac  | aatgcaatagttcaaccagggatttctgtcattctaattcca<br>agtctctg   |
| 73713<br>(T/C) | Intron | -          | gaaggttgattagccatgttcatctgggcaacaata<br>aaggatata       | gttgacatccagatcttccaatcactttctccttaacctgtac<br>ctgggt    |
| 73803          | Intron | -          | tgtacctgggttctgagaacaaggtatctgaagagcta                  | catgagggggcaaaaagtaggaaggcagctgagagtcagg                 |



|                |        |            |                                                             |                                                         |
|----------------|--------|------------|-------------------------------------------------------------|---------------------------------------------------------|
| (A/C)          |        |            | tgtgttgccagc                                                | aagtataaagat                                            |
| 73865<br>(A/C) | Intron | -          | aaagtaggaaggcagctgagagtcaggaagtataaa<br>gattctgaagagtt      | cacatgcaggaagatggacagaaaccagttcagaccac<br>gtcagcgtttc   |
| 73975<br>(T/A) | Intron | -          | ggactatcaaatacataggaaaagtgtttcataggttg<br>gacaacagaca       | gacaggcctgagaaaattcagaaagggaatcaaggaga<br>tcaaccttacc   |
| 74145<br>(C/T) | Intron | -          | ttgcttaactgaggagagagactggagtttggatgcc<br>tcaggecatctga      | gtattctaggctggctaagaatgagaggggatttgggaG<br>gaaaggagct   |
| 74185<br>(G/A) | Intron | rs13198987 | aggcatctgaCgtattctaggctggctaagaatgaga<br>ggggatttggga       | gaaaggagctccaagaatacacaccgaagtcttctcaagg<br>ctttggctaa  |
| 74970<br>(C/T) | Intron | -          | cactggatggccttataaccagtttagatattatggtag<br>gaaaagggtgaa     | gagaaaatgattcaattaaagctagacaaaccacaagaca<br>gaCagacaga  |
| 75008<br>(-/+) | Intron | -          | ggaaaagggtgaaCgagaaaatgattcaattaaagct<br>agacaaccacaag      | aCagacagacacaaatacacatacacacaatgactgaac<br>caattaatcaa  |
| 75013<br>(C/G) | Intron | -          | aggtgaaCgagaaaatgattcaattaaagctagacaa<br>accacaagacaga      | agacagacacaaatacacatacacacaatgactgaaccaa<br>ttaatcaaca  |
| 75438<br>(-/+) | Intron | -          | ggaaaagcaaataagacacaaggaaaggggatgga<br>tggaatatgcca         | caatgacattcagtgaacaagaaaatagaccaacaagga<br>gtaaatccat   |
| 75849<br>(C/T) | Intron | rs7754526  | ACGTGCATAAAAACAATCTACAAG<br>ACTCACTTCAAATCTCTCAGTT<br>AATC  | AAAGTAAACATATTTGGCAGAAGGTG<br>GAAGGAGGGTATTCTGATCCTTTCT |
| 75882<br>(G/A) | Intron | rs9456550  | AAATCTCTCAGTTAATCCAAAGT<br>AACATATTTGGCAGAAGGTGGAA<br>GGAG  | GTATTCTGATCCTTTCTTGTACACAT<br>TGATGTTTTCTCTCGGTTTTCTTA  |
| 75970<br>(T/C) | Intron | -          | CTCGGTTTTCTTATGGAGTATAG<br>ACGAGTTTGGATGTGTTACAATA<br>AGAA  | GATAATCTGTCTTTGAAATGTTTACA<br>GTTGTTTAGAAGTTGAGGACGATT  |
| 76022<br>(G/A) | Intron | rs7755463  | ATAATCTGTCTTTGAAATGTTCA<br>CAGTTGTTTAGAAGTTGAGGACG<br>ATTT  | TGATTGTTACAGGACCTTTAGTGAG<br>AATATTTCAAAGTCACTTTTTACCA  |
| 76094<br>(A/G) | Intron | -          | TGAGAATATTTCAAAGTCACTTT<br>TTACCACCTTTGTTACAACAAAAT<br>GTAG | GGATGTCTGGTGCCCTTGTATCTTCT<br>CCCATCTCTGGTGAACCTGTATTGT |
| 76503          | Intron | -          | cctcagcgccttctctgggggaaccagggctgagatt                       | acaggggtgtgtcttttaggaagcgtgcagacctttagggc               |



|                |                   |           |                                                        |                                                        |
|----------------|-------------------|-----------|--------------------------------------------------------|--------------------------------------------------------|
| 79651<br>(G/A) | Intron            | rs4073498 | agaagaaaaagatatcatgacagacattatacttgaag<br>cgatgatggctC | caacacgccaaaTatacagaaaacaagaaactcatagtc<br>aagaagctaaa |
| 79664<br>(T/C) | Intron            | rs6917128 | atcatgacagacattatacttgaagcgatgatggctC<br>Gcaacacgccaaa | atacagaaaacaagaaactcatagtcagaagct<br>aaatgactcaggtata  |
| 79736<br>(T/C) | Intron            | rs7758127 | tagtcaagaagctaaatgactcaggtatagaattttaa<br>gagcaaaactc  | atgatttactgggatatacatagttaagttgcctcaattcaa<br>Gctaaa   |
| 79781<br>(G/T) | Intron            | -         | aactcTatgatttactgggatatacatagttaagttgc<br>ctcaattcaaa  | ctaaaaagaaaaaagggggttcctatgaacaacagctttg<br>acagctgtt  |
| 79996<br>(A/G) | Intron            | -         | aacaaaggagtaaatccatgaaacagaaagttaggtt<br>ctttgaaaagtct | taTgattggccaaagtctggctaaacagatgacagaccaa<br>ggagggagca |
| 79999<br>(T/A) | Intron            | -         | aaaggagtaaatccatgaaacagaaagttaggttcttt<br>gaaaagtctAa  | gattggccaaagtctggctaaacagatgacagaccaagga<br>gggagcatat |
| 80181<br>(G/C) | Intron            | rs7771801 | gatcaactgtatgtaataaattcatgaatgtagatcat<br>gtggatggatt  | Ctaggtaataacaatcagcaaatcaaacactgaataga<br>Tcatgcagt    |
| 80182<br>(C/T) | Intron            | -         | atcaactgtatgtaataaattcatgaatgtagatcatgt<br>ggatggattG  | ttaggtaataacaatcagcaaatcaaacactg<br>aatagaTcatgcagtt   |
| 80223<br>(T/C) | Intron            | -         | gatggattGCtaggtaataacaatcagcaaatca<br>aacactgaataga    | catgcagtttatagagacttacagacagcctgacagataaa<br>catttga   |
| 80300<br>(A/G) | Intron            | -         | cagcctgacagataaacatttgtatgtacgtgaaacaa<br>tctccaagacac | cttcaaatccctctcggttaatccaaggaatgtatttgca<br>gaaggta    |
| 80499<br>(T/C) | Intron            | rs7752727 | taagctgtctttgaaatgtgacagttgttagaagttga<br>ggaccatttg   | gagtgttatgggactttagtgagaatatttcaaatttcttgtt<br>acact   |
| 80733<br>(G/A) | Exon              | -         | tggtgttataccatggatcccagtgatgagggagta<br>ctgcaacctgac   | caatgtccagtgatggaatcaactCtctcacaactcccac<br>ggtgggtccc |
| 80758<br>(C/G) | Exon <sup>4</sup> | rs7765803 | tcagatgggagtactgcaacctgacGcaatgtccagt<br>gatggaatcaact | tctcacaactcccacgggtgtcccagttccaagcacaga<br>gCttccttct  |
| 80800<br>(C/G) | Exon <sup>5</sup> | rs7765781 | aatcaactCtctcacaactcccacgggtgtcccagtt<br>ccaagcacagag  | ttccttctgaagaaggtaagaagcctgcagtcagacaacca<br>taccctcgg |
| 80936<br>(G/A) | Intron            | rs9365178 | tgcagaaaacttccatgctgcacaggaagtcgaaggt<br>gaagtcatggaca | ccaatgggaaggaagcttcagtccttctctg<br>gggaccAgagctggga    |
| 80977<br>(A/G) | Intron            | -         | tcatggacaGccaatgggaaggaagcttcag<br>tgcttctctggggggacc  | gagctgggatgtttagtgccttgtgagggatggtgtcttaa<br>aaggggca  |

|                |                       |            |                                                            |                                                         |
|----------------|-----------------------|------------|------------------------------------------------------------|---------------------------------------------------------|
| 81072<br>(C/T) | Intron                | -          | ggggcacagaccctctaggacactggattta<br>tcacttccctgttatcaaa     | gaatcatattagtgcctagccaagatggatatttaacatcc<br>tgccaaa    |
| 81308<br>(A/G) | Intron                | rs6455689  | cttcattagatccgtattgtcctgagactttgaagcagta<br>catagccacc     | aattgtttatctccccagcctaccttcatcttgggcatgecttc<br>cacacc  |
| 81780<br>(C/T) | Intron                | -          | tgcttgttctcatgaacaccagaagaggtgaagca<br>aaagaccattca        | atgagtgaatgttgaagtataggcactctgatctgtttttgttt<br>gttt    |
| 81841<br>(T/C) | Intron                | rs10085279 | tttgaagtataggcactctgatctgtttttgtttgttcttt<br>gtttgt        | tgtttccagggtgaattaaatattatgactactattaaatt<br>tcta       |
| 82124<br>(A/C) | Exon <sup>6</sup>     | -          | gcactgggggtccaggactgctaccgaggtga<br>tggacagagttatcgagggc   | cactctccaccactatcacaggaagaacatgacgtcttgggt<br>cgtctatg  |
| 82191<br>(G/A) | Exon <sup>7</sup>     | -          | cacaggaagaacatgacgtcttggctgctatgacac<br>cacattggcacc       | gaggatcccattatactatccaatgcGtatgctatcatgtt<br>agccata    |
| 82219<br>(G/A) | (Splice) <sup>8</sup> | -          | tctatgacaccacattggcaccGgaggatcccattata<br>ctatccaatgc      | tatgtctatcatgttagccataaaaaggaacaata<br>gtcaactaaaatttct |
| 82385<br>(-/+) | Intron                | -          | GCAAAATGTCTCAGGAACTTAC<br>TTTTGAGCAAAGGTCTGAATGA<br>AGAG   | TTT TAGGATTGCTATCTTTCATAACA<br>ATTTGATGGAAGCAGCAGGATATA |
| 82493<br>(T/C) | Intron                | -          | GTGGTGAAGTCTCATTAATGTAA<br>AGCTAAGGAGATCAAATGACCA<br>AATGC | GAGACAAAGTATCATTCCACAATGC<br>CCACTAAAGGTCCATGCAGTCTTTC  |
| 87089<br>(A/G) | Intron                | rs6910635  | catcaacaaggaacaagttactgatagtctc<br>agaagcatgaacaaacctc     | aaaatatattaaggaagaagccagacgtcaaagtgtatag<br>tctgtatga   |
| 87549<br>(C/T) | Intron                | -          | atgtgtagagtctctacagagaccgtgttgattcccat<br>gctccataata      | gtccaagtttctcagacagccacaggtcatgaatgtgagg<br>attctgag    |
| 87673<br>(C/G) | Intron                | -          | ggcataatggggaaggcattctcaagattcctccag<br>cctgggggtctca      | ctgctgtgcctcttactgcattgtttctgactcatcatagcc<br>acttga    |
| 87758<br>(C/G) | Intron                | -          | atccatagccacttgacccttcagatcccatagtctac<br>ctagccgtctc      | ctttatgccttgggtcccgtgttctttcaactcatcaccatt<br>ccttca    |
| 87822<br>(T/A) | Intron                | -          | gtcccgtgttcttcaactcatcaccattcctcagtc<br>ccagagtggc         | gcagccagcagaggatggactgagagcaggagaggag<br>gtcgtgcccAtga  |
| 87869<br>(A/G) | Intron                | -          | ggcTgcagccagcagaggatggactgagagcagg<br>agaggaggtcgtgcc      | tgaacctcctagagaagcagcatcctgcctgggagcta<br>gtttccagg     |
| 89105          | Intron                | rs7775704  | aatatgtgaagattccaagccaataagcctttccagtg                     | ctttttcattgcaatctacagtttgcagtttctaAgaacatg              |

|                |                   |           |                                                           |                                                            |
|----------------|-------------------|-----------|-----------------------------------------------------------|------------------------------------------------------------|
| (A/G)          |                   |           | atttaaagtag                                               | gccttt                                                     |
| 89142<br>(A/C) | Intron            | -         | tgatttaaagtagActttttcattgcaatctacagtttgc<br>agtttctta     | gaacatggcctttgagtatgatatcctagagaaacctaagg<br>agactgcat     |
| 89256<br>(C/T) | Intron            | rs9364564 | tcctggggctgcatagcaggaggtaccaacgaatg<br>ctgtctcctctgg      | ctatctcagctttcacaggctctgttcacctcagctttgaagt<br>tagaaa      |
| 90066<br>(T/C) | Exon <sup>9</sup> | -         | ggacggagtTATCGAGGCATATCCTC<br>CACCCTGTCACAGGAAGGACCT<br>G | CAATCTTGGTCATCTATGATAACCAC<br>ACTGGCATCAGAGGACCCAGAAAA     |
| 90141<br>(T/C) | Intron            | -         | CACTGGCATCAGAGGACCCAGAA<br>AACTACCCAAATGCGTATGTAT<br>TTGA | TAAAACCATAAGAGGAGCAACAGC<br>CAACTCAAATATTGGTTAGAAGACC<br>C |
| 90148<br>(C/T) | Intron            | rs3798221 | ATCAGAGGACCCAGAAAATA<br>CCCAAATGCGTATGTATTTGATT<br>AAAAC  | ATAAGAGGAGCAACAGCCAACTCA<br>AATATTGGTTAGAAGACCCATGCTT<br>T |
| 93380<br>(A/T) | Intron            | -         | agtccctctccactagtagctgatgcaggaggc<br>caaccagcaciaa        | atagagcattaaaccaccaaagctaggaaccctatggag<br>tccattgca       |
| 94153<br>(T/C) | Intron            | rs6906412 | caatccaacaagacaaagaataaaggataagaaaa<br>tatgaacaagcct      | caagatgtctctgggattatgttaaatagaccaaata<br>taagaataatcGtggc  |
| 94199<br>(G/C) | Intron            | -         | gcctTcaagatgtctgggattatgttaaatagaccaa<br>ataagaataatc     | tggtcctgaggaaaaagacaataactaaaagcttgaaaa<br>catatttggg      |
| 94548<br>(C/T) | Intron            | -         | tcagcaggaactgtacaagctataaaggattggagcc<br>ctatcatagcctc    | tcaaacaaaacaattatcagtcagaattttgatccagcga<br>aagtaagc       |
| 94639<br>(A/G) | Intron            | -         | gaaagtaagcatcatatagaaggaaagatacagtcg<br>ttttggacaaa       | aatgctaagagaattcaccattaccaagtcaccactagaag<br>aactgctaa     |
| 94853<br>(G/A) | Intron            | -         | aaaaaacaacaaagtacggaggcaataaagaata<br>tgatgaatgcagtg      | cacctcacattcaatgctaaaattgaatctaaatggcctaaa<br>tgctcca      |
| 95172<br>(C/T) | Intron            | -         | gggtcagggaaactcctcccctagccaaaggaagcc<br>gtgagggactgtgc    | gtgaagaccagtgcattctggcacaataactatgctttccc<br>acggtctt      |
| 95554<br>(A/G) | Intron            | -         | agtctgaagttgacctgggacgctcaagcttggtggg<br>aggaggggtatcc    | Caaatactggggcttgagtaggaggtttcccctcacagtg<br>taagcaaaa      |
| 95555<br>(C/T) | Intron            | -         | gtctgaagttgacctgggacgctcaagcttggtggga<br>ggaggggtatccA    | aaatactggggcttgagtaggaggtttcccctcacagtgta<br>agcaaaa       |
| 95606          | Intron            | rs9456548 | aaatactggggcttgagtaggaggtttcccctcacag                     | gctaggaagttgaaactgggcagggtgcactgcagcttgg                   |

|                 |                    |           |                                                            |                                                         |
|-----------------|--------------------|-----------|------------------------------------------------------------|---------------------------------------------------------|
| (C/T)           |                    |           | tgtaagcaaaac                                               | caaagccatt                                              |
| 109817<br>(G/A) | Exon               | -         | tgaggtgggagtactgcaatctgacacaatgctcaga<br>aacagaatcaggt     | tcctagagactcccactgttgtccagtccaagcaTggag<br>gctcattct    |
| 109854<br>(T/C) | Exon <sup>10</sup> | -         | aacagaatcaggtGtctagagactcccactgttgttc<br>cagttccaagca      | ggaggctcattctgaagcaggtgaagaagtctgtggccaga<br>tatctacaca |
| 110480<br>(G/A) | Intron             | -         | ttgtgccttctctcatggaacgtgcatctttggtgtgtg<br>tgagaggaa       | ggtagtagactctgctttgtgcaatgcaggatgctggaac<br>aagaggat    |
| 110675<br>(C/G) | Intron             | -         | gaactgccccgtccaccagaagcttaaggctttggctt<br>ttcaggagcaat     | AtctagggaaCtgtgcaGggtttcAtgtctgtccccTa<br>ctgacagccaa   |
| 110676<br>(A/G) | Intron             | -         | aactgccccgtccaccagaagcttaaggctttggcttt<br>caggagcaatC      | tctagggaaCtgtgcaGggtttcAtgtctgtccccTact<br>gacagccaat   |
| 110686<br>(C/A) | Intron             | -         | tccaccagaagcttaaggctttggctttcaggagcaa<br>tCActtagggaa      | tgtgcaGggtttcAtgtctgtccccTactgacagccaatc<br>accatacag   |
| 110693<br>(G/A) | Intron             | -         | gaagcttaaggctttggctttcaggagcaatCActca<br>gggaaCtgtgca      | ggtttcAtgtctgtccccTactgacagccaatcaccatac<br>agcctgcat   |
| 110701<br>(A/C) | Intron             | -         | aggctttggctttcaggagcaatCActtagggaaCt<br>gtgcaGggtttc       | gtctgtccccTactgacagccaatcaccatacagcctgca<br>taacctaat   |
| 110713<br>(T/C) | Intron             | -         | ttcaggagcaatCActtagggaaCtgtgcaG<br>ggttttcAtgtctgtcccc     | actgacagccaatcaccatacagcctgcataacctaatcca<br>tcateGtct  |
| 110760<br>(G/A) | Intron             | -         | cccTactgacagccaatcaccatacagcctgcataa<br>cctaatccatc        | tctggttctgctcattgtttcatgaacaaccagtagaga<br>gccatac      |
| 110921<br>(C/T) | Intron             | rs9457938 | accaggttttgaatataaaatttctaagaacttataaaat<br>attagaatg      | tattaatctattgttttgcctcagcatgccttctgcttgtagt<br>atac     |
| 111502<br>(T/C) | Intron             | -         | gctacatggagctgatgaggtcttttaataataaagctc<br>aagagatcaaa     | gatcaataacttagagTGCCATTCTACAAGGC<br>TCATAAAAGATCAATGCA  |
| 111542<br>(A/G) | Intron             | -         | agagatcaaaTgatcaataacttagagTGCCAT<br>TCTACAAGGCTCATAAA     | GATCAATGCACTCTTTCACCCATGC<br>AATTCTATCATTCTAACCTCCCTTC  |
| 117525<br>(C/T) | Intron             | -         | GGCCAGTAGAGGATGGACTGAG<br>AGTAGGAGAGGAGGTTCTGCCCA<br>GGAAC | CATCCTAGAGAAACAGCATCCTGCC<br>TGGGACCTAGTCTTCCAGGTCAGCT  |
| 117597<br>(A/G) | Intron             | -         | TGCCTGGGACCTAGTCTTCCAGG<br>TCAGCTTTTATAAGTCTTTTAGAC<br>TCA | ACTCACTTGACCCACCTGAAGTGGT<br>ATTGACAATAATGCTATTTTCATGG  |

|                 |                   |           |                                                             |                                                         |
|-----------------|-------------------|-----------|-------------------------------------------------------------|---------------------------------------------------------|
| 117916<br>(G/A) | Intron            | -         | CACATCAAAATCCGTATACCGGT<br>TCCTCTAGGGGTATGTGCTTGGC<br>AGAA  | GTAGAAGGAGGGTATTCTGGTTCCT<br>TTCTTTTGCACATTTATGTATGATC  |
| 118364<br>(C/T) | Intron            | -         | ttgtaacttaccagctctgtctcgggtatttctcatagc<br>aatgtgagAA       | GGGCTAATACAAGCATATACTACTT<br>TTGATATTTTAAAATAAAAATTATC  |
| 118667<br>(C/T) | Exon <sup>9</sup> | rs1801693 | GAACTACTGCAGGAATCCAGATG<br>CCGATACAGGCCCTTGGTGTTTT<br>ACCA  | GGACCCCAGCATCAGGTGGGAGTAC<br>TGCAACCTGACGCGATGCTCAGACA  |
| 118757<br>(T/A) | Exon              | -         | ATGCTCAGACACAGAAGGGACT<br>GTGGTCGCTCCTCCGACTGTCAT<br>CCAGG  | TCCAAGCCTAGGGCCTCCTTCTGAA<br>CAAGGTAAGAAGTCTGTGTCTTACC  |
| 118950<br>(G/A) | Intron            | -         | AGCTCGAGTGTTGGTTGAGGTTT<br>TGCCATGACCAAGGAAGTCTCAG<br>TGCC  | TCCCTGGGAAAGCCAGAGCTGTGAT<br>TTTTGGCACAACCTTGTGGGAGTAGT |
| 119220<br>(C/T) | Intron            | -         | TTGCAGTCTTCAGCGTTGTGGCT<br>CCTGAgggatGTGGCCCCTGATTCT<br>GT  | GTCCTAGAGAAGCCTGACATGACTG<br>CATTGATTCTGTATCGTCCTGGGTC  |
| 119221<br>(G/A) | Intron            | -         | TGCAGTCTTCAGCGTTGTGGCTC<br>CTGAgggatGTGGCCCCTGATTCTG<br>TC  | TCCTAGAGAAGCCTGACATGACTGC<br>ATTGATTCTGTATCGTCCTGGGTCT  |
| 119232<br>(G/A) | Intron            | -         | GCGTTGTGGCTCCTGAgggatGTGG<br>CCCCTGATTCTGTTCGTCCTAGAG<br>AA | CCTGACATGACTGCATTGATTCTGTA<br>TCGTCCTGGGTCTATGTGGCTGCC  |
| 119328<br>(C/T) | Exon              | -         | CTGCCTGGCTGTCTGTAATCATCT<br>GTTTTATTTTATTTTTTTCTACA<br>GA   | TGTATGTTTGGGAATGGGAAAGGAT<br>ACCGGGCAAGAAGGCAACCACTGT   |
| 119421<br>(T/C) | Exon              | -         | ACCACTGTTACTGGGACGCCATG<br>CCAGGAATGGGCTGCCAGGAG<br>CCCCA   | AGACACAGCACGTTTCATTCCAGGGA<br>CAAATAAATGGGCAGGTCTGGAAAA |
| 121300<br>(C/T) | Intron            | -         | ATTCTATCACAATATCACAGGAA<br>GCTAAGGatgatactgcctttgtgtg       | ttgctgtggatggtgcataatgcatGGAAGTAAG<br>CATTCTGAATCAAC    |
| 121754<br>(C/T) | Exon              | -         | GGAGCTTACATGCCTGCTTGT<br>CAGTACTGCCGTAACCCTGATGG            | ATCAATGGTCCCTGGTGCTACACAA<br>TGAATCCAAGAAAACCTTTTACTA   |

|                 |        |           |                                                            |                                                            |
|-----------------|--------|-----------|------------------------------------------------------------|------------------------------------------------------------|
|                 |        |           | TGA                                                        |                                                            |
| 121755<br>(A/G) | Exon   | -         | GAGCTTACATGCCTGCTTGTTC<br>AGTACTGCCGTAACCCTGATGGT<br>GAC   | TCAATGGTCCCTGGTGCTACACAAT<br>GAATCCAAGAAAACCTTTTGGACTAC    |
| 121949<br>(C/G) | Intron | rs9365169 | GAAAATGGCTTTTGAGCTGAGTG<br>CTTCTGGGGAGGAGATGGCTGCC<br>CTCT | CACCAGAGCCTGCTTTTCATCATGG<br>CCACCTTGAACCTGCCCTACTATTG     |
| 122105<br>(G/A) | Intron | -         | AAATGTCAAATTCCCAAAGGGCA<br>AACTTAGAGGTGATCTAATCAGC<br>CCGG | ATAGTCCCACCGAACCTTCTTTGTC<br>TAGCGTGGGATGCATGAAAAACAA      |
| 122189<br>(T/C) | Intron | -         | GGATGCATGAAAAACAAATTTAG<br>AGTCATTATGATGAAAACTGTC<br>CTCT  | CTGCAGCTGAGAAGAAAAAAAAAA<br>TACGAGCAGCAGGAAACAGCTAAG<br>CA |
| 122323<br>(C/G) | Intron | -         | CTAGGAAATCAATGAAGGGTAGT<br>GCAGCTCTTTAGCCCCAGATGGC<br>CTTT | TCGTAAGATTACTACTCATGAGTCC<br>CATTAGCGACATTGCTTAGAGACTG     |
| 122478<br>(A/T) | Intron | -         | GGATCAGGGGAAGGGGAATTGA<br>CATTAGATCTTAAATGATTGGGG<br>TAACA | ATCCATGGGGGAAAAAAGCCACTT<br>GTACTTGTTCCTATTTTCTTCCTG       |
| 122648<br>(G/C) | Intron | -         | GCTTGTGGTTGGGTCTGCCATGT<br>GAAGGGACCTTGAGCTGGGGGA<br>AGAAG | TTGGCCTCCAAGTCCACTGAAGACC<br>AGCATCCTGAGATTGCCTGGGGAGG     |
| 122678<br>(T/C) | Intron | -         | CCTTGAGCTGGGGGAAGAAGGTT<br>GGCCTCCAAGTCCACTGAAGACC<br>AGCA | CCTGAGATTGCCTGGGGAGGTGGTA<br>CAGGGCAGTGATGAAGATCATGGGA     |
| 123674<br>(A/C) | Intron | -         | CAGCACTAGAAAAGATGATTGCA<br>TTCCATGCCATGCTTCTTTTTTAC<br>AAA | GACTTCTATAGATAGATTCTCAAAA<br>CAACCCACAGCAAATGAAAAGTTAT     |
| 124126<br>(T/C) | Intron | -         | CCCCAGAAGAACTGTCCTGAAGC<br>TGGCTGAGAGAAGGCAACATTC<br>AACA  | AGGACAGTTATCCTTGCTACATAAA<br>ATCAcatacAcacatgacatatgt      |
| 124161<br>(A/G) | Intron | -         | GGCAACATTTCAACATAGGACAG<br>TTATCCTTGCTACATAAAATCAcat       | cacatgacatatgtccacacacagactcacatgcaaa<br>agaatcttt         |



|                 |        |            |                                                            |                                                          |
|-----------------|--------|------------|------------------------------------------------------------|----------------------------------------------------------|
|                 |        |            | ac                                                         |                                                          |
| 124327<br>(-/+) | Intron | -          | ttgtgttactaccacttttaacttagaaagaaaatc<br>taaagagtg          | tatGattttaccatttaattcacctttgagatgtgaaaaacta<br>gtgctt    |
| 124332<br>(G/C) | Intron | -          | gtttactaccacttttaacttagaaagaaaaactaaa<br>gagtgttat         | atttaccatttaattcacctttgagatgtgaaaaactagtgc<br>tggaa      |
| 124522<br>(G/C) | Exon   | -          | TTGTGGGAAGCCTCAAGTGGAGC<br>CGAAGAAATGTCCTGGAAGCATT<br>GTAG | GGGGTGTGTGGCCCACCCACATTCC<br>TGGCCCTGGCAAGTCAGTCTCAGAA   |
| 124648<br>(C/T) | Intron | rs6920765  | ATCTATACTGTCCTTCCATGTAA<br>GCCCCACAAAACCCTTCTACATT<br>TACA | AGAACCCACACAGCTGATGCATCAA<br>TACCTGCCTCTCTGTTTTCTGAAGG   |
| 124707<br>(A/G) | Intron | -          | CACAGCTGATGCATCAATACCTG<br>CCTCTCTGTTTTCTGAAGGAGGA<br>AAAA | TATAGAAAAATTAATAAAAAAGTTATA<br>TTATTATAGGTTCTCTACTTGGAAA |
| 124720<br>(A/T) | Intron | -          | TCAATACCTGCCTCTCTGTTTTCT<br>GAAGGAGGAAAAAATATAGAAA<br>AATT | AAAAAAGTTATATTATTATAGGTTT<br>TCTACTTGGAAAATAGCCAAAATAC   |
| 124810<br>(T/A) | Intron | -          | AGCCAAAATACAAATCTTTTTCT<br>TGATCTGGGCAGTTCATCAAAA<br>TCTG  | AGGCACAGTGATTTGCACCAAGTTC<br>CAATACTTTTGGAAAATATTGAAGA   |
| 125066<br>(A/G) | Intron | rs11751605 | CATTGAATTCAATGCCGAGGCTA<br>TTCATCTATTACAAACACATGA<br>ACAA  | TTATGGGTTGTGATCCCCATAAATG<br>AAGAGTAATCAGTCCGAACCCACAG   |
| 125282<br>(-/+) | Intron | -          | CTTCCTCATCTCCTTTCTACACCA<br>GGGCACCTGTGCTCAATTGCTGT<br>TCT | CTAAAGAGACTTCCTTCTGTAAGTTT<br>GTGAAATGCCATCGACAAACCTGA   |
| 125383<br>(C/T) | Intron | -          | GATCGCATCGCATTTCACTCTGC<br>TGTTGAGTTGATTTTCTTTACTT<br>TAT  | GTTTGTAACTTCTTGCTCTACAGAGC<br>TTTCACCTTCCACATATTTTCTGAT  |
| 125663<br>(C/T) | Intron | -          | CCCAAAGTAAACTTTTCAGGTA<br>AGATCAGAAGACCCTCATGAGTC<br>ACTG  | TGCTCAGGATCGTATCTGGCTCCTTG<br>AAGAGTGACCTTGCATAGATCTTG   |
| 125793          | Intron | rs7767084  | GTCTTGGGCTGGTCACTTTTGTC                                    | CAGCTATAGAGCTTCATTCTGGAGT                                |

|                 |        |            |                                                            |                                                         |
|-----------------|--------|------------|------------------------------------------------------------|---------------------------------------------------------|
| (A/G)           |        |            | GAGTCCAGGGCTGTGGGGTGAA<br>AGCC                             | CACTTAGCTTTGCTCTCCTGGGGAC                               |
| 126061<br>(C/T) | Intron | -          | CCTGGCTTTCTGTACAATGAAGT<br>AGAACAAACCATCCAATTTGACC<br>AAAG | CTTGGCATGTTTTCTTTCTAGGTTTG<br>GAAAGCACTTCTGTGGAGGCACCT  |
| 126474<br>(G/T) | Intron | -          | ACCGCAGGACAGAGCTGTTCCT<br>ACCAGAGGCATCAATCTGTATTG<br>CATT  | CTCTAGAGCAATATCTGAGGCTGAA<br>TAATTTATAAAGAAAAGAGTTTAAAT |
| 126495<br>(C/A) | Intron | -          | CTACCAGAGGCATCAATCTGTAT<br>TGCATTGCTCTAGAGCAATATCT<br>GAGG | TGAATAATTTATAAAGAAAAGAGTT<br>TAATTGGCACATGTTTCTGCAGGCT  |
| 127938<br>(G/A) | Intron | rs6919346  | CTGGTGAAATTTTGTTTTATTAAG<br>CCTGACAAAGTGATACCTTTGCT<br>TAC | TCACTTAAAGTTAGTCTATTTGGACC<br>TAGGTGACAGTACAATCAGCTAAG  |
| 128046<br>(C/T) | Intron | -          | ATTTGTAGGAGAGGCAGGTTTGG<br>GACAGGTGACAAGGCATGTGGG<br>GTGCT | GCTGTGCTGGTGGCTCTGGAAGGCA<br>GGGTGTCAATGCAGACAGGGATGAG  |
| 128267<br>(C/T) | Intron | -          | CTGACACTCTAGGAAGGAGAGA<br>AGGGCCTTTCTGGCTCAGCCTTT<br>ATAAA | AGTAGCTGATCTCCCTCTTGCTCCCC<br>AGGGTCCTCCCCACCATCCCAGCA  |
| 128295<br>(G/A) | Intron | -          | TTTCTGGCTCAGCCTTTATAAAC<br>AGTAGCTGATCTCCCTCTTGCTCC<br>CCA | GGTCCTCCCCACCATCCCAGCAAAT<br>GTGCAAATACAAGATCTCTGCTCCT  |
| 128303<br>(C/T) | Intron | -          | TCAGCCTTTATAAACAGTAGCTG<br>ATCTCCCTCTTGCTCCCCAGGGTC<br>CTC | CCACCATCCCAGCAAATGTGCAAAT<br>ACAAGATCTCTGCTCCTCATGGTCC  |
| 128466<br>(T/A) | Intron | rs12194138 | GCATTCTCTGATAGGCTGATACG<br>TTTTGAGTTTAGAGTTCCCACCG<br>CACA | CCCCACCCCCTAGAGTCTAGGGCA<br>TTTAGTGCTCCATGAGGGAACTGT    |
| 128754<br>(A/T) | Intron | -          | GTCCCTGGGATTCTAAGGTATAT<br>GAATGTCCTTGGAACAATACC<br>ATTT   | GTTTCATGCAAGGTGCTTATTTCCCAT<br>CCTCTTTCATTTGATGTCTAGCAT |
| 128864          | Intron | rs7750767  | TTCTTACCACCACGGTTTAGTAA                                    | GATGGAGCAACTTGCTCTGGGCACA                               |

|                 |        |           |                                                            |                                                            |
|-----------------|--------|-----------|------------------------------------------------------------|------------------------------------------------------------|
| (A/G)           |        |           | CATTCACGAGGAGGAAGTGGAG<br>GATCC                            | CAAGGCATTTGCAATTTTATACCCT                                  |
| 131213<br>(C/T) | Intron | -         | agaagtcaaactgggtcacagtctgccctgaacc<br>catcactgactgg        | tctgacctgcaccaattgttccatgtggaggtgaaggcaa<br>gacccact       |
| 133918<br>(C/T) | Intron | -         | tgacaagtgcctgtttcataggaccgttgaggattaa<br>gtgagatatac       | aCattatgagcttgcctggaaaggtgattcttagtaaatg<br>atgacta        |
| 133920<br>(C/T) | Intron | -         | acaagtgcctgtttcataggaccgttgaggattaaagt<br>gagatatacCa      | attatgagcttgcctggaaaggtgattcttagtaaatgat<br>gactatt        |
| 134025<br>(T/G) | Intron | -         | tttattgcaataaaattatacaacatagagtactatttta<br>accatttt       | gcaggtaccactgagtggcattcagtacattcacaatgggtg<br>gcaaccgt     |
| 134796<br>(C/T) | Intron | -         | TCAATAGATCAAAGTCTTGTGCT<br>CTCCCGTCTCAGTCTCAGTCCCTT<br>AGA | GTCAGTCCCAAAGTGGCAAATTCAG<br>GAAGGTTTTGTCAGTGGAAAGACCCC    |
| 134822<br>(G/A) | Intron | -         | CCGTCTCAGTCTCAGTCCCTTAG<br>ACGTCAGTCCCAAAGTGGCAAAT<br>TCAG | AAGGTTTTGTCAGTGGAAAGACCCCA<br>GTCTAAGTGTTGCTCAGAAACTCCC    |
| 134825<br>(G/A) | Intron | -         | TCTCAGTCTCAGTCCCTTAGACG<br>TCAGTCCCAAAGTGGCAAATTCA<br>GGAA | GTTTTGTCAGTGGAAAGACCCAGTC<br>TAAGTGTTGCTCAGAAACTCCCCAG     |
| 135087<br>(T/C) | Intron | -         | AGAGGAAGGTAGAGGGTACAGG<br>ACCGAGACAAATTACACACTT<br>AACAA   | GATGTCCAGGCTAGCCCAGTCTAAA<br>GGAAACACCAAGTTAGGAAGCAAT<br>G |
| 135160<br>(A/G) | Intron | -         | AAAGGAAACACCAAGTTAGGAA<br>GCAATGCATGCAGGATTCACAAG<br>GGATT | TTTTTTTTCCAGGAAAAAACTAAGT<br>GATGTGGTTTTGTTGAATAGACTT      |
| 135262<br>(T/C) | Intron | rs3127596 | GCTAAGTACTTAAGCACTGCAGA<br>TGCTTGAGTAATATGCTCATAAG<br>TTCC | TTCTGATTTGAATTACTGGGAAAAT<br>GTACATATGGATAAGAGAAGGATGG     |
| 135459<br>(C/T) | Exon   | rs3124784 | AGGACAAATACATTtacaaggagtcact<br>tctggggtcttgctgtgca        | gccccataagcctgggtctatgctcgtGTTTCAAG<br>GTTTGTACTTGG        |
| 135676<br>(T/G) | 3 UTR  | -         | AAACGAAGACACTGTTCCAGCT<br>ACCAGCTATGCCAAACCTTGGCA<br>TTTT  | GGTATTTTTGTGTATAAGCTTTTAAG<br>GTCTGACTGACAAATTCTGTATTA     |

|                 |            |   |                                                            |                                                        |
|-----------------|------------|---|------------------------------------------------------------|--------------------------------------------------------|
| 135807<br>(A/C) | 3 flanking | - | TAAACTCTGCACTTATTTTGATTT<br>GAATTAATTTTGGTTTTGGTCTTC<br>AA | ATTTTCATGCTCTTTTCATCCCATCT<br>ATTTTTATTTTTATTTTTTAGACT |
| 135964<br>(T/G) | 3 flanking | - | GCCATGGTAGTTTGCTGCACCCA<br>TCAACCTGTCATCTAATTCGGTA<br>TTTC | TTTAGTTCTATCCCTCCCCTAGCCCT<br>CCACCCCTTGACAGGCCCAGGTGT |
| 135972<br>(C/T) | 3 flanking | - | AGTTTGCTGCACCCATCAACCTG<br>TCATCTAATTCGGTATTTCTTTTA<br>GTT | TATCCCTCCCCTAGCCCTCCACCCCT<br>TGACAGGCCCAGGTGTGTGATGTT |

<sup>1</sup>SNP -772 (G/A) originally described by Wade et al (1993).

<sup>2</sup>SNP +93 (C/T) originally described by Zysow et al (1995).

<sup>3</sup>SNP +121 (G/A) originally described by Cohen, Chiesa, and Hobbs (1993).

<sup>4</sup>Kringle IV type 7 (Leu/Val) polymorphism originally described by Prins et al (1999).

<sup>5</sup>Kringle IV type 7 (Leu/Val) polymorphism originally described by Prins et al (1999).

<sup>6</sup>Kringle IV type 8 (Thr/Pro) polymorphism originally described by Prins et al (1997).

<sup>7</sup>Kringle IV type 8 (Arg/Gln) polymorphism originally described by Ogorelkova et al (2001).

<sup>8</sup>Null mutation (G/A) originally described by Ogorelkova, Gruber, and Utermann (1999).

<sup>9</sup>Kringle IV type 9 (Cys/Cys) polymorphism originally described by Ogorelkova et al (2001).

<sup>10</sup>Kringle IV type 9 (Met/Thr) polymorphism originally described by Ogorelkova et al (2001).

<sup>11</sup>Kringle IV-37 (Met/Thr) polymorphism originally described by van der Hoek et al (1993) and Kraft et al (1995).

**Supplementary Table 2. Location, rs number, and sequence context of SNPs in *PLG*.** SNPs are numbered based on the GenBank accession number AY192161.

| SNP (alleles) | Location within gene | rs #      | 50 bases 5' flanking the SNP                         | 50 bases 3' flanking the SNP                          |
|---------------|----------------------|-----------|------------------------------------------------------|-------------------------------------------------------|
| 357 (C/G)     | 5' flanking          | rs4252043 | tcaacagcaggctgtagtagtaagttttgagagtc agagttataacct    | gattttctactgtgtatggcaGtgtccaaccctgaaatt gatcaaGg      |
| 380 (A/G)     | 5' flanking          | rs4252044 | aagttttgagagtcagagttataacctGgattttctact gtgtatggca   | tgtgccaaccctgaaattgatcaaGgggtcaactgtaate ctaaaagaat   |
| 406 (A/G)     | 5' flanking          | rs4252045 | tGgattttctactgtgtatggcaGtgtccaaccct gaaattgatcaa     | gggtcaactgtaatectaaagaatctaatacaatattgtaA acagtaagt   |
| 447 (C/A)     | 5' flanking          | rs4252046 | attgatcaaGgggtcaactgtaatectaaagaatcta atacaatattgta  | acagtaagtggcaataaataaggaattgaactaataaga atacataaat    |
| 499 (T/C)     | 5' flanking          | rs2163235 | cagtaagtggcaataaataaggaattgaactaataa gaatacataaatc   | cagaatatgtgcaacctgatcatagtacacagagatctctc tatatatct   |
| 586 (T/C)     | 5' flanking          | rs2144723 | ctctctatatatctcttttcttagttcatgctgttcttcag gtagaaag   | gcctattttgaattagttgtctttagagcaaaaatccctcca agagtgcc   |
| 708 (-/+)     | 5' flanking          | rs4252183 | cctggaatagtcattgcttcatgctaccctggacat gaagggccatgc    | GCagcgggaagtctctATGCACCCACCCCC GTCTATACCTGAGCAACACAT  |
| 709 (A/G)     | 5' flanking          | rs4252047 | ctggaatagtcattgcttcatgctaccctggacatg aagggccatgcc    | CagcgggaagtctctATGCACCCACCCCCGT CTATACCTGAGCAACACATT  |
| 710 (T/C)     | 5' flanking          | rs4252048 | tggaatagtcattgcttcatgctaccctggacatga agggccatgccG    | agcgggaagtctctATGCACCCACCCCCGTC TATACCTGAGCAACACATTC  |
| 911 (G/A)     | 5' flanking          | rs4252049 | GTAGGGAAGAATGTACAGCCAG GAGGCCATTAGGAGGGCAACTA ATTTAT | AAATCACATTTGTAGAATTTAATGC ATCCAACAACCTACCAGGGGAAAGG T |
| 1154 (G/A)    | 5' flanking          | rs4252050 | TAAATACATGCTGGAAGCATTA TATATTAGTAGAGtatttttttccca    | agtactttctcaagcacatcaacatgagccccctaagaga catttccat    |
| 1280 (T/C)    | 5' flanking          | rs4110432 | tggtttctcaatctgctccacctctgtcccctttaatg aactgggcca    | gaggtgagtcagagaggataaaggagtggtgaagaAtt tgaggagagaag   |
| 1316 (G/A)    | 5' flanking          | rs1853019 | aatgaactgggccaCgaggtgagtcagagaggat aaagggagtggtgaaga | tttgaggagagaagagagtgaggctaaaataggaatca ggaaaagcgat    |
| 1412 (C/T)    | 5' flanking          | rs4252051 | gcgattcgggtccccctgcccctccatggggccacc ctcttgttggccag  | gtggCttctcttgagggttctgcatggttcccaatcccag ggaattcc     |

|               |             |           |                                                            |                                                         |
|---------------|-------------|-----------|------------------------------------------------------------|---------------------------------------------------------|
| 1417<br>(T/C) | 5' flanking | rs4252052 | tgggtccccctgcctcacatggggccaccctcttg<br>tgcccagTgtgg        | ttctcttgagggttctgcatggttctcaatcccaggaatt<br>ccgcagg     |
| 1470<br>(G/A) | 5' flanking | rs4252053 | cttcttgagggttctgcatggttctcaatcccagga<br>attccgcaggac       | ttccaccaagaccattgggctcccaccttactcttttgc<br>agttaatg     |
| 1721<br>(T/C) | 5' flanking | rs4252054 | agacttaagccagggaaaagtacagattcaacattta<br>aaattgagataga     | Gctttccacttaatgctaccagtcttctttattcatgagaa<br>tgagaat    |
| 1722<br>(A/G) | 5' flanking | rs4252055 | gacttaagccagggaaaagtacagattcaacatttaa<br>aattgagatagaC     | ctttccacttaatgctaccagtcttctttattcatgagaatg<br>agaata    |
| 1903<br>(A/G) | 5' flanking | rs1864450 | cactgggaataaataaattttgaagataataagatact<br>ttcacttatgtc     | taatttctatgtcatttgggttaggatgtagagatattaacgtt<br>tacacc  |
| 1959<br>(C/T) | 5' flanking | rs1864449 | tctatgtcatttgggttaggatgtagagatattaacgttt<br>acacctaact     | aagtttgcataagacctgaaAggggtttgtctatcagct<br>gcaccct      |
| 1983<br>(G/A) | 5' flanking | rs2314852 | agagatattaacgtttacacctaactTaagtttgcac<br>taagacctgaa       | gggtttgtctatcagctgcaccctgggtagagacacaa<br>ccttggGgaa    |
| 2030<br>(A/G) | 5' flanking | rs4252184 | gaaAggggtttgtctatcagctgcaccctgggtag<br>agacacaaccttgg      | gaaggcctcagccccatccctcGtacagcaggaatgag<br>aacagccctgcc  |
| 2053<br>(A/G) | 5' flanking | rs4252056 | caccctgggtagagacacaaccttggGgaaggc<br>ctcagccccatccctc      | tacagcaggaatgagaacagccctgcctgttgggaagctt<br>gaGggaggct  |
| 2096<br>(C/G) | 5' flanking | rs4252057 | atccctcGtacagcaggaatgagaacagccctgcc<br>tgttgggaagcttga     | ggaggctatggacgtgcagcGcttggcagaGggtctc<br>gtcatggaagggt  |
| 2117<br>(A/G) | 5' flanking | rs4252058 | agaacagccctgcctgttgggaagcttgaGggagg<br>ctatggacgtgcagc     | cttggcagaGggtctcgtcatggaagggtccagcaaatgt<br>gagatacttt  |
| 2127<br>(A/G) | 5' flanking | rs4063598 | tgctgttgggaagcttgaGggaggctatggacgt<br>gcagcGcttggcaga      | ggtctcgtcatggaagggtccagcaaatgtgagatactttt<br>atgatttca  |
| 2190<br>(A/G) | 5' flanking | rs4252059 | gaaggttccagcaaatgtgagatactttatgatttcat<br>tttccaaaa        | aaaggggaataagagaagaggggaggaaataagactaat<br>tgcgagagataa |
| 2354<br>(T/G) | 5' flanking | rs1830521 | ATTGCTTTCACCACTTCCCAGCA<br>TCTATTGCAGATTCCACCCTCAA<br>ACAT | TTGTAaggactctttattcaaggtaaTgtttgaacct<br>gctgagccagt    |
| 2381<br>(C/T) | 5' flanking | rs1950562 | TTGCAGATTCCACCCTCAAACAT<br>GTTGTAaggactctttattcaaggtaa     | gtttgaacctgctgagccagtggcatgggtctctgagag<br>aatcattaac   |
| 2498          | 5' UTR      | rs4252060 | gtttgtgatgcgttactctcatgtaagtcaacaacat                      | accactttctgggactgctggccagtcccaaatggaa                   |

|               |        |           |                                                            |                                                          |
|---------------|--------|-----------|------------------------------------------------------------|----------------------------------------------------------|
| (A/G)         |        |           | cctgggattgg                                                | cataaGgaag                                               |
| 2544<br>(A/G) | Exon   | rs4252061 | ttggGaccactttctgggcaactgctggccagtc<br>aaaatggaacataa       | gaagtggttcttacttcttttatttctgaaatcaggt<br>aagacatagtt     |
| 2609<br>(T/G) | Intron | rs2314851 | acttcttttatttctgaaatcaggtgaaacatagtt<br>aaattataa          | aattatttttctcccacaatgtagtaaaaatacata<br>Tgccatggcttta    |
| 2620<br>(-/+) | Intron | rs4252062 | tctgaaatcaggtgaaacatagtttttaattataa<br>Gaattatttt          | ctcccacaatgtagtaaaaatacataTgccatggctt<br>atgtgcaattca    |
| 2647<br>(C/T) | Intron | rs4252185 | tttaaattataaGaattatttttctcccacaatgtag<br>taaaaatacata      | gccatggctttatgtgcaattcatttaattttgatt<br>catgaaactcca     |
| 2737<br>(G/A) | Intron | rs4252063 | tgaacttccagttgaaaatctgtataagattgagga<br>attctcaagaa        | taagttaagtctctgtgaagattgcagggtgctgga<br>aatGggca         |
| 2783<br>(A/G) | Intron | rs4252064 | agaaAaagttaagtctctgtgaagattgcagggt<br>gctggaatgaat         | ggcagagaaaataatgggtgattttcaaatctaaat<br>gagtgacccaca     |
| 2967<br>(C/T) | Intron | rs4252065 | ctaatttatcatctctgttacgggtgcatgctcccct<br>acttgcaagt        | aaaacagtgaaatatctcttgaatatattccgttctc<br>accagttcat      |
| 6321<br>(A/G) | Intron | rs4252066 | acatgtgcaggtgtgtacataactaaattgctgaca<br>ctgagctttggg       | tacaaatgatcccatcaccaggtagtgagctaaatac<br>taataagg        |
| 6431<br>(A/G) | Intron | rs4252067 | agcccttgccctgctcccctctcccctctctggtagtc<br>cccagtgctt       | agttgccatctttatTTATGTCCAAATGCCCG<br>ACTGTGTGTTCTTAACTA   |
| 6462<br>(T/C) | Intron | rs4252068 | tgtagtcccagtgcttTagttgccatctttatTT<br>ATGTCCAAATGCC        | GACTGTGTGTTCTTAACTAAACATT<br>TTGATTCATAGCTACCCATTCTACT   |
| 6523<br>(-/+) | Intron | rs4252069 | TCTTAACTAAACATTTTGATTCA<br>TAGCTACCCATTCTACTTCCAGT<br>AAAC | AAAGTTTTATTTGGTTAATGCTAAC<br>CAAATAGATTAAGGAAGTCATG<br>A |
| 6754<br>(A/G) | Exon   | rs4252070 | AGCTGGGAGCAGGAAGTATAGA<br>AGAATGTGCAGCAAAATGTGAG<br>GAGGAC | AAGAATTCACCTGCAGGTATTTCCA<br>TTGTCGTTGCACCTACGCAGGAATC   |
| 7437<br>(A/G) | Intron | rs4252071 | ggaccattaagagatgaagtgactaaagcagagac<br>tttgttaggtgac       | ggcttgggaaggtagctatggaAtccagactgagcacc<br>catagcaggacc   |
| 7460<br>(T/A) | Intron | rs4252072 | ctaaagcagagactttgttaggtgacGggcttggg<br>aaggtagctatgga      | tccagactgagcaccatagcaggaccacgggatggag<br>atgggaggggtc    |
| 7595          | Intron | rs4252073 | tcaggggaactgatcagagttgggaggtcatggag                        | gaatgggtcaagcaaccagagttgcttcttccaacca                    |

|                |        |           |                                                            |                                                            |
|----------------|--------|-----------|------------------------------------------------------------|------------------------------------------------------------|
| (T/C)          |        |           | acggactatcttgg                                             | aaaacaaaa                                                  |
| 7727<br>(A/G)  | Intron | rs4252074 | agttgaaacaggaagaaagggaaaattatgagggga<br>gggaaggttaagggca   | ataagattgctgccacgttggtgtattttgttcagtaactcat<br>cgatgc      |
| 7813<br>(A/G)  | Intron | rs4252075 | gtacttcacgatgccatgccccaaataactgaaagag<br>gcagcaattctga     | ctctctggtcctcaagatattcaatgatctttagcatgtctc<br>acttatt      |
| 8118<br>(G/A)  | Intron | rs4252076 | cctccccatcctcccactcttctcttctctattctatct<br>ttaatttat       | agaccagaggaggaaggcactatcgtgtataaaaactga<br>attctgagtta     |
| 10995<br>(C/A) | Intron | rs4252077 | tcatcattaagtgatctcattttatattgttccttgaatat<br>ttctgta       | ccccctgectgattccaCtagaatgtaagctccatgacg<br>gccaagcctc      |
| 11014<br>(T/C) | Intron | rs4252078 | ttttatattgttcttgaatatttctgtaAccccctgc<br>ctgattcca         | tagaatgtaagctccatgacggccaagcctctggctgac<br>tgtgccccgt      |
| 11142<br>(T/C) | Intron | rs4252079 | atacacagagagctcataagtagcatttgaatacatg<br>aatcaagaatGG      | TCAGTTTACTGCAGCCTTTTTGCAG<br>ATGCAAAAGATGATCTTTTAGAAA<br>G |
| 11233<br>(A/G) | Intron | rs4252080 | TTTTAGAAAGCAGAAACAGGGG<br>GTCTGGTGCATGAGATCTTTTTC<br>TCAAC | TGACTATGCTGTGCAGACCTTCATG<br>TGGTGTCTTGTGAAAGACTTTGACC     |
| 11342<br>(T/C) | Exon   | rs4252081 | GACTTCCCTTCAGTGTATCTCTC<br>AGAGTGCAAGACTGGGAATGGA<br>AAGAA | TACAGAGGGACGATGTCCAAAACA<br>AAAAATGGCATCACCTGTCAAAAA<br>TG |
| 11411<br>(A/C) | Exon   | rs4252186 | AAAACAAAAAATGGCATCACCT<br>GTCAAAAATGGAGTCCACTTCT<br>CCCCA  | AGACCTAGGTAAGACATTCCCTTTC<br>ATCTTTGTGTTTCATCTACTGTAAAG    |
| 11613<br>(G/T) | Intron | rs4252082 | TAACCTACATACCTTCTCTTGTA<br>TAATCCCTAATATAATGTAAATG<br>CTAT | TAATCGTTGTTATACTGTATTGTTTT<br>TATTTGTATTATGTTTTATTGTCA     |
| 11681<br>(C/A) | Intron | rs4252083 | TATTGTTTTTATTTGTATTATGTT<br>TTATTGTCATATTGTTATTTCTG<br>TC  | TCTTTTTCAAGTCTTTTCCATCCACA<br>GTTGGTTGAATTTGTGGATCTGGA     |
| 11774<br>(A/T) | Intron | rs4252084 | GATCTGGAACCCATGGATACAG<br>AGGGCCAAGTATTTAGGATA<br>ATTTCA   | CACTTTTAATTCAAACCACAATATG<br>TGAATAAGCAGATAGAAAGAATCT<br>T |



|                |        |           |                                                            |                                                           |
|----------------|--------|-----------|------------------------------------------------------------|-----------------------------------------------------------|
| 11913<br>(T/C) | Intron | rs4252085 | GAACATGGTTGCTTTCTATTTTT<br>TCTTGGATATGGAGGTTTCTTGA<br>AGAC | TAGAACATAGAAGAATGCCTAGTT<br>TAAAAAAAATCAATGAACTATGA<br>GT |
| 11921<br>(C/T) | Intron | rs4252086 | TTGCTTTCTATTTTTTCTTGGATA<br>TGGAGGTTTCTTGAAGACCTAG<br>AACA | AGAAGAATGCCTAGTTTAAAAAAA<br>ATCAATGAACTATGAGTTTTAGGC<br>C |
| 12000<br>(C/T) | Intron | rs1853018 | ATGAACTATGAGTTTTAGGCC<br>AAATCTGAGAAAAGATCAAAGA<br>TGACTA  | GTTTGGGACTGAAGTAAGCATATCa<br>ggtagaactctcatcacatgttcg     |
| 12242<br>(T/C) | Intron | rs1853017 | gttctcagtaatgacgcttatcaaataggaacttagtg<br>ctgttactcac      | ttatccattccccaacactcaacaaattgcctttgctatat<br>ccctatg      |
| 12321<br>(C/G) | Intron | rs1853016 | ttgcctttgctataccctatgagatgagcagatcaaat<br>attccccgtga      | ttaatgaaaactgattcaacaaatggcaaagtcagagact<br>atcgggggc     |
| 12440<br>(A/G) | Intron | rs4252087 | cattttatgaggtagtctaggctcatctttatgagggga<br>actgaggtctc     | gggggtgggggttatcccaaataggttcacagaagaacc<br>agaaataaaac    |
| 12531<br>(C/T) | Intron | rs3798903 | gaaataaaacctgccttttagactgtaagtcttgtgat<br>ttcatctaaa       | ggtgtcTctatacagcaactcatctctagaactgaaaata<br>agcttaaat     |
| 12539<br>(A/T) | Intron | rs4252089 | acctgcctttctagactgtaagtcttgtgattttcatcta<br>aaTggtgtc      | ctatacagcaactcatctctagaactgaaaataagcttaaat<br>ccctctc     |
| 12740<br>(T/A) | Intron | rs4252090 | cttaggcaagttttgtttgtttttacgttgccactc<br>agttttctc          | tctgtaaatagggAataaacaccttctcaaatggtttta<br>ttaggact       |
| 12755<br>(G/A) | Intron | rs4252091 | ttttgtttgtttacgttgccactcagttttctcAtctgta<br>aaataggg       | taataaaccttctcaaatggttttattaggactaaaagag<br>agaatgtg      |
| 12847<br>(A/G) | Intron | rs4252092 | gagaatgtgtgaaagatgtagtgaattcctggca<br>gatagttcacatg        | acaaaatggtattaactacaaaattttacagAgaaaacg<br>gtaactgac      |
| 12881<br>(G/A) | Intron | rs4252093 | gcagatagttcacatgGacaaaatggtattaactaca<br>aaaattttacag      | gaaaacggtaactgacaaaagcaGgtgtttggaatgaatt<br>aagaccatgg    |
| 12905<br>(C/G) | Intron | rs4252094 | ggtattaactacaaaattttacagAgaaaacggta<br>actgacaaaagca       | gtgtttggaatgaattaagaccatggcagcctttgaggcc<br>tttatatt      |
| 13134<br>(A/G) | Intron | rs4252095 | ctgcagcaccagctgaaatgcattggatgacaatc<br>tcagatgggaatc       | agagcatctccttctgccttgctaataagcaagctgatttttag<br>aatatag   |
| 13469<br>(G/C) | Intron | rs4252096 | gccccctccacaggggatgtattaataattgagtaac<br>gtattcacctct      | ggaaagaagcaaacccagaattaacctgaattttttttt<br>tctgaga        |

|                |        |           |                                                             |                                                             |
|----------------|--------|-----------|-------------------------------------------------------------|-------------------------------------------------------------|
| 14509<br>(A/G) | Intron | rs4252097 | TGCTTCTCAACAACATAAAAAG<br>AGAAGCGCTGTCCTTCAGGTG<br>AATATT   | TTCTCCCTGAGGCCATGAGCATAAA<br>CAAAAACCTCCAGACTAAAACCCTG<br>A |
| 14673<br>(T/C) | Intron | rs4252098 | GATCATTATTGAAATGAAGATG<br>CCAAATATTGAAAACCTCTAAT<br>GGAGAA  | GTAGACTCCTGGGAATATATGCACC<br>CTTGAGCTCCCCACTGGCCTGTGCA      |
| 14703<br>(+/-) | Intron | rs4252099 | TGAAAACCTCCTAATGGAGAACG<br>TAGACTCCTGGGAATATATGCA<br>CCCTTG | GCTCCCCACTGGCCTGTGCATCCCG<br>GTCTAAGGACATGGCATCATGGAA<br>A  |
| 14875<br>(-/+) | Intron | rs4252100 | GGAAAATGACATTTGGATTATG<br>CTAGAAAATCCTGAGTCCTTATT<br>GCCAA  | GTGCCTGTTGTGAATTACATCGGAA<br>TGAGAGGCAAGTCGCACTTAAGTG<br>A  |
| 14888<br>(A/T) | Intron | rs4252101 | TGGATTATGCTAGAAAATCCTG<br>AGTCCTTATTGCCAATTTTATTG<br>CCAAG  | GCCTGTTGTGAATTACATCGGAATG<br>AGAGGCAAGTCGCACTTAAGTGAG<br>T  |
| 14889<br>(A/G) | Intron | rs4252102 | GGATTATGCTAGAAAATCCTGA<br>GTCCTTATTGCCAATTTTATTGC<br>CAAGT  | CCTGTTGTGAATTACATCGGAATGA<br>GAGGCAAGTCGCACTTAAGTGAGT<br>A  |
| 14905<br>(G/A) | Intron | rs4252103 | TCCTGAGTCCTTATTGCCAATTT<br>TATTGCCAAGTGCCTGTTGTGAA<br>TTAC  | TCGGAATGAGAGGCAAGTCGCACT<br>TAAGTGAGTAGGATTCTGGTTTTTA<br>C  |
| 14951<br>(C/T) | Intron | rs4252104 | TTACATCGGAATGAGAGGCAAG<br>TCGCACTTAAGTGAGTAGGATT<br>CTGGTT  | TTACTCTCTATTTTGCTTCATCCATT<br>TCAGTTTTCTTCTCCTCTCTGTC       |
| 15255<br>(A/T) | Intron | rs4252105 | TTGCTGTCATTTAGATATTTTAG<br>CATTCTCAAGAAGTGAACGCC<br>TGATG   | TTTTAATTTCAAAGCTAACCTCCTC<br>CCACAATATTGCAAGTGAAATACG<br>C  |
| 16455<br>(G/A) | Intron | rs4252106 | CATTTTAAAGACTGCTATCATTT<br>GTGGTTGAATAACTGGAATTTG<br>CTTAC  | TCAATTTTCCAGATGGCCAAAATGA<br>TAAGGTCACTGATTCTGTTGAGTGA      |
| 16715<br>(C/T) | Intron | rs4252107 | TAAAAACAAACAAAAAAAAGA<br>AAGTCCTTGGAATACAGGGCCA<br>ACCTTGT  | TCCTAGTTGCCATCTCTGAACACAG<br>CCTTCATCTGATTACCTCCTCCATG      |

|                |        |           |                                                             |                                                              |
|----------------|--------|-----------|-------------------------------------------------------------|--------------------------------------------------------------|
| 16720<br>(T/A) | Intron | rs4252108 | ACAAACAAAAAAAAAGAAAGTCC<br>TTGGAATACAGGGCCAACCTTG<br>TTTCCT | GTTGCCATCTCTGAACACAGCCTTC<br>ATCTGATTACCTCCTCCATGCCCGA       |
| 16860<br>(G/T) | Intron | rs4252109 | GAAAAAGAGTCTTATCCATGAA<br>TGTAATGTTTCAGTGCTACTAAA<br>ATCTT  | CTTGTCCATTTCAGATTTCCAAACAA<br>GAACCTGAAGAAGAATTACTGTCTG<br>T |
| 16976<br>(T/C) | Exon   | rs14224   | CTGCGGCCTTGGTGTTCACCCAC<br>CGACCCCAACAAGCGCTGGGAA<br>CTTTG  | GACATCCCCCGCTGCAGTGAGTATG<br>ATGCACACCCAGATTCCAGGATTTG       |
| 16987<br>(A/G) | Exon   | rs4252187 | GTGTTTCACCACCGACCCCAAC<br>AAGCGCTGGGAAC TTTGCGACA<br>TCCCC  | CTGCAGTGAGTATGATGCACACCC<br>AGATTCCAGGATTTGGACCTGCCCT<br>G   |
| 17953<br>(G/A) | Intron | rs4252188 | gtgagaattcggggtgtgaggtgacactgttgata<br>cttaccaggttagga      | gaactgagcaagagaacatagaaagaagcacctacc<br>aagggtcttct          |
| 18045<br>(G/C) | Intron | rs783146  | ggtctttctctgaaggagttcctgtgaaagggtctca<br>caggcatagatg       | tactaaattgattcatctgaaaacatgaaacaattctcaagt<br>gccaaat        |
| 18114<br>(A/G) | Intron | rs3823055 | tgaaaacatgaaacaattctcaagtgccaaattccaa<br>gagaggctgagca      | aagccaagacaggccagaacacctgcagccatctctct<br>taacatccatc        |
| 18255<br>(C/T) | Intron | rs3778217 | gcacggtggctcacgcctgtaatccagcacttccg<br>gaggccgaggtggg       | ggatcacgaggtcaggagttcaagaccaactggccaat<br>atgatgaaacc        |
| 18475<br>(A/G) | Intron | rs4252111 | gagctgagatcgtgccactgactccagcctgggcg<br>acagagcgagactcc      | tctcaaaaaTAtatatatattcattgtaacttattttgccc<br>tcaagc          |
| 18486<br>(+/-) | Intron | rs4252189 | gtgccactgactccagcctgggcgacagagcgaga<br>ctccGtctcaaaaa       | tatatatattcattgtaacttattttgccattcaagcaacacc<br>tccacc        |
| 18679<br>(T/C) | Exon   | rs1130656 | cactggagtgacagaccctcacacataacag<br>gacaccagaaaactt          | ccctgcaagtaagtcccctccGgtctcattctgtgctatg<br>gaatgtgaa        |
| 18701<br>(A/G) | Intron | rs2295368 | acacacataacaggacaccagaaaacttCcctgc<br>aagtaagtcccctcc       | gtctcattctgtgctatggaatgtgaaatcccattgactttg<br>ccttagt        |
| 19056<br>(G/A) | Exon   | rs13231   | gagtactgtaagataccgtcctgtgactcctccccag<br>tatccacggaaca      | ttggctcccacaggtgaaagggatgggagcttactga<br>gggcccaggt          |
| 19335<br>(A/G) | Intron | rs4252113 | gaatgtgtctctgcggtgttggtggggtgttccct<br>caaggtcattta         | gtgaagttggtgctggtgttctctgtatccttactgattgtc<br>tgtctc         |

|                |        |           |                                                             |                                                            |
|----------------|--------|-----------|-------------------------------------------------------------|------------------------------------------------------------|
| 22389<br>(C/T) | Intron | rs4252114 | CCTCGTGTTCATGAACACTCA<br>GTAGGGACCCATAAAAAAGAGC<br>TTGCA    | GTAAGTGCAATTTCCAATTATAAGT<br>ACTCTATCTGTTCTTTCACACCCAG     |
| 22398<br>(G/A) | Intron | rs4252115 | CTCATGAACACTCAGTAGGGAC<br>CCATAAAAAAGAGCTTGCATGT<br>AAGTGC  | ATTTCCAATTATAAGTACTCTATCT<br>GTTCTTTCACACCCAGGTTTTAAAT     |
| 22432<br>(C/A) | Intron | rs4252116 | GCTTGCATGTAAGTGCAATTTCC<br>AATTATAAGTACTCTATCTGTTC<br>TTTC  | CACCCAGGTTTTAAATGAAATATTA<br>CTAGGAACTTATTAATGTTCTAAAA     |
| 22575<br>(G/A) | Intron | rs4252117 | AAAAGAGAACAGTCATAATTCT<br>CAGAGGCTACCGTACTGTTTTTG<br>TCATA  | ATTGCTTCATGCTTCTTTTTTTTCAG<br>TAATTGTTAAGCTTGATTTCTTTT     |
| 22598<br>(+/-) | Intron | rs4252118 | AGAGGCTACCGTACTGTTTTTGT<br>CATAAATTGCTTCATGCTTCTTT<br>TTTT  | CAGTAATTGTAAAGCTTGATTTCTT<br>TTATTTTAATTCAGCACCCACCTGA     |
| 22764<br>(T/C) | Exon   | rs4252119 | CCACCACCACAGGAAAGAAGTG<br>TCAGTCTTGGTCATCTATGACAC<br>CACAC  | GGCACCAGAAGACCCCAGAAAAC<br>ACCAAATGCGTATGTCTTTGATTT<br>T   |
| 22807<br>(C/T) | Intron | rs4252120 | ACCACACCGGCACCAGAAGACC<br>CCAGAAAACCTACCCAAATGCGT<br>ATGTCT | TGATTTTTACTGTAAGAGGGGCATC<br>AGCCAACTGAAATTTCTGTAAAG       |
| 22833<br>(G/A) | Intron | rs4252121 | AAAACCTACCCAAATGCGTATGT<br>CTTTGATTTTTACTGTAAGAGGG<br>GCATC | GCCAACTGAAATTTCTGTAAAGAA<br>GCCATGCTTCATGCTTCAAGCCAAC      |
| 30655<br>(T/C) | Intron | rs4252122 | AGAGAAATGGCATCCTGCCTGG<br>GAGCTAGTTTCCAGGGTGGCTT<br>TGATA   | GTCTTGCAGAAACAAACCCACTTG<br>ACACACCTGATACGGTATTGACAGT<br>A |
| 30819<br>(A/C) | Intron | rs4252123 | TTAGAGTAAGGTGACTGGCCTG<br>GGAATGATAACCATCTTGGATGT<br>CATTTT | TCCTTGGAGAAATGTATTTTAGTTC<br>CAATGCACATTTACAATACAGTCC      |
| 31220<br>(T/G) | Intron | rs4252124 | GAATATTTCAAAGCCACTTGTTA<br>ACACTTTGTTAGAACAAAATGT<br>AGAGG  | TGCTGGGTGCCCTGAATATTCTCC<br>CACCTCTTGTGACCTGTATTGTTTT      |

|                |        |           |                                                            |                                                            |
|----------------|--------|-----------|------------------------------------------------------------|------------------------------------------------------------|
| 31439<br>(A/G) | Exon   | rs4252125 | CAGGAACAGAAGCGAGTGTGTG<br>AGCACCTCCGCCTGTTGTCCTGC<br>TTCCA | ATGTAGAGACTCCTTCCGAAGAAG<br>GTAAGAAATCTGTGGCTGGACATCT<br>A |
| 31493<br>(G/A) | Intron | rs4252126 | TAGAGACTCCTTCCGAAGAAGG<br>TAAGAAATCTGTGGCTGGACAT<br>CTACAC | CTTGGACGCTGGGATGAAAAGCCA<br>TGAAAATCTCACTGATGCAGAAA<br>CC  |
| 31591<br>(A/G) | Intron | rs4252127 | ACCTTCCATGCTACACGAGAAA<br>TCAAGTGTTTTTAGAGGGTCTGC<br>CATGT | GAAGGAAGCCTCAGTGCCTCTCTC<br>AAGGAGGCAGAGGTGTGACTTTTG<br>G  |
| 31648<br>(G/A) | Intron | rs783145  | AGCCTCAGTGCCTCTCTCAAG<br>GAGGCAGAGGTGTGACTTTTGG<br>CACAAC  | TGAGTGGGCTGTGCCTTTAGGACAG<br>GTGCAAACCCTCCAAGGTGCTCAA<br>C |
| 31760<br>(G/A) | Intron | rs4252190 | CCTTGTTCTAAAATGGGTTATCT<br>CAGTATCCCAGTCCAAATTCGTA<br>TTCT | TCATGCTGCCATATGTGTGATTCTT<br>TCCAAGCCAGTAAGCATCTCCAGTA     |
| 32018<br>(T/C) | Exon   | rs4252128 | CTGTACAGACTGTATGTTTGGGA<br>ATGGGAAAGGATACCGAGGCAA<br>GAGGG | GACCACTGTTACTGGGACGCCATGC<br>CAGGACTGGGCTGCCAGGAGCCC<br>C  |
| 32104<br>(T/C) | Exon   | rs4252129 | CTGCCCAGGAGCCCCATAGACA<br>CAGCATTTCCTCCAGAGACA<br>AATCCA   | GGGCGGGTCTGGAAAAAATGTAA<br>GCCACTTTGATTTGGACTCTTTGGC<br>C  |
| 32279<br>(C/A) | Intron | rs4252130 | AATGGGGGAGAGGGGACAGAA<br>GAAAATATTGGAAAGGCATCAG<br>GGGGCTA | GCTAGAATATAATTGGCCTTAGTAT<br>GGAAAGTACAAGCAGCACAGGCCA<br>G |
| 32382<br>(A/C) | Intron | rs4252191 | AACCTCCACACATGTGAGGGTT<br>CTCAGGCCTCTTCCCTTTAGTGA<br>CATTT | TTAAAGTTTCCATTATTGGGGACT<br>GTCTCTAGTTTCTAGTGTTTGTATG      |
| 32488<br>(-/+) | Intron | rs4252131 | TTCCAGTAATCAAAGATGCCCTT<br>TATGAAATTTAAGTCAGATTTTT<br>CGAG | AAAAATTTGGATGGGCCATCAGGT<br>CACCATGGGACTTCCCTTAGCCTCA<br>T |
| 32556<br>(G/T) | Intron | rs4252132 | ATCAGGTCACCATGGGACTTCC<br>CTTAGCCTCATGCATTCTCTGCG<br>ATGGT | TACTTTGGGGCCTATGAATAGGGA<br>AGACTGAGATATAGGAAAAACCAA<br>AG |

|                |        |           |                                                              |                                                             |
|----------------|--------|-----------|--------------------------------------------------------------|-------------------------------------------------------------|
| 32662<br>(-/+) | Intron | rs4252133 | GTGTTCCCCACTCTCACACCCA<br>TGCAGCATAAACTTCTCACACC<br>AGAT     | GGGGGATTTCTCCTCACACCCAAG<br>CGAGTCTCCAGCAGATACCAGCTG<br>G   |
| 32726<br>(C/T) | Intron | rs4252134 | CCTCACACCCAAGCGAGTCTC<br>CAGCAGATACCAGCTGGGTGTC<br>CTACAA    | GTAACTCAGTGCTGACACTCTATCT<br>GGAGACagtgtcagatccataagt       |
| 33431<br>(T/G) | Intron | rs4252135 | GGGGCAGAGACCAAATATACGT<br>TTCTTATTCTACCACAGTGTCAT<br>ATGAA   | GGGAGGACAACACTGCCTTTCTGTG<br>TCTTGCCCCATAGAGGGGCGCACAAT     |
| 33436<br>(A/G) | Intron | rs4252136 | AGAGACCAAATATACGTTTCTT<br>ATTCTACCACAGTGTCATATGAA<br>GGGA    | GACAACACTGCCTTTCTGTGTCTTG<br>CCCCATAGAGGGGCGCACAATGCAT<br>G |
| 33649<br>(A/G) | Intron | rs4252137 | TCTAAGGCCTCCACTGGGTGTCAG<br>GCTCCTGAAGGGAGACCCATTC<br>TCCAAA | ACCCCCGAGGGTCACCACTCCCTGT<br>CCAGGGGTGTGGCCTCATAGCTCCT      |
| 33723<br>(T/C) | Intron | rs4252138 | GTCCAGGGGTGTGGCCTCATAG<br>CTCCTTTTGAACAGGGGCACAG<br>GAAGGA   | GGCTTTAGAGCATTCAAAAATAA<br>CTTTGCCAAAATAATAATAATA<br>A      |
| 33775<br>(+/-) | Intron | rs3057040 | GCTTTAGAGCATTCAAAAATA<br>ACTTTGCCAAAATAATAATAAT<br>AATAAT    | AGAAAGGAAGAAGAGGCTGAGCAT<br>GGTGGCTCACACCTGTAATCCCTAC<br>A  |
| 33920<br>(C/G) | Intron | rs1972748 | TTCGAGACTAGCCTGGCCAAA<br>TGGTGAAACCTCATCTCTACTGA<br>AAATA    | AAAAAAAAATTAGCCAGGTGTGGT<br>GGCGTGCACCTGCAGTTGCAGCTAC<br>T  |
| 33921<br>(-/+) | Intron | rs4252139 | TCGAGACTAGCCTGGCCAAAAT<br>GGTGAAACCTCATCTCTACTGA<br>AAATAG   | AAAAAAAAATTAGCCAGGTGTGGTG<br>GCGTGCACCTGCAGTTGCAGCTACT<br>C |
| 33948<br>(A/G) | Intron | rs4252192 | AACCTCATCTCTACTGAAAATA<br>GAAAAAAAAAATTAGCCAGGTGT<br>GGTGGC  | TGCACCTGCAGTTGCAGCTACTCAG<br>GAGGCTGAAGCAGGAGAATCGCTT<br>G  |
| 34010<br>(C/T) | Intron | rs4252140 | TTGCAGCTACTCAGGAGGCTGA<br>AGCAGGAGAATCGCTTGAACCC<br>AGGAGA   | GGAGGTTGCAGTGAGCTGAGATCA<br>TGCCACTGCACTCCAGCCTGGGCGA<br>C  |

|                |        |           |                                                            |                                                            |
|----------------|--------|-----------|------------------------------------------------------------|------------------------------------------------------------|
| 34158<br>(T/C) | Intron | rs1317026 | gaagGAAAAAGAAACACTCCTTT<br>ATGTcTTCTAAGGATAGACATGA<br>AATG | GTGAGCCTTGGAACACCTTCTCCCT<br>CTCCTGCCCCACGTGAGCTGGAGCT     |
| 36373<br>(T/C) | Intron | rs4252141 | cttgaagggtGGAGACAACAGAGAA<br>GCATTTTTGAATACCCTCTGCAG<br>C  | CCTGCACTGTTGTAGGCATTGGTGG<br>ATGGTACCAAAGATGGGACACTGT<br>C |
| 36513<br>(T/C) | Intron | rs4252193 | GGCAGGGAGGAGGAAAAGAAG<br>AATAAAGTCATATGTTTAAGTC<br>ACCCCA  | GGCCGTTGGTTAGTCATGGGAGGCT<br>CCCCAGAGGAGCTGTCCTGAAGCT<br>G |
| 36636<br>(-/+) | Intron | rs4252142 | ACTTAGGACAGTAATCCTTGCTA<br>CATACAATCACATACACACACA<br>CACAC | GTGCACACACAGAGACTCACATGG<br>AAAAATAAACCTTTGTGCCTTTCAG<br>C |
| 37340<br>(T/C) | Intron | rs4252143 | CTGCAAACCCTTCTACATTTAC<br>ATAAAATCCACACAGCTGAGGC<br>ATCAG  | ACCTGCCTCTAAGTTTTCTGAAGGA<br>GGAAAAAGCTACAAAATTAATA<br>T   |
| 37404<br>(C/T) | Intron | rs4252144 | TTTTCTGAAGGAGGAAAAAAGC<br>TACAAAATTAATATATGTATAT<br>ATACA  | ATATATTTTTATAGGTTCTCTACTGT<br>GAAAATGACAAAATTGCTGTCTT      |
| 37700<br>(C/T) | Intron | rs4252145 | CAGTCTATCACAGGCACAGATT<br>CTTTTTCTTGGACACTTTCGTG<br>AATCA  | TGAATTCAATGCAGAGGCTACTCAT<br>CCATTCGCAAACAAAAAATTCTA<br>G  |
| 37932<br>(A/G) | Intron | rs4252194 | AAACAGGCCCATCCGTCTGCCT<br>GTTTTGCTTCTCATCTCACTTCT<br>ACAC  | AGGGCGCCTGTGCTCAATTGCTGTT<br>TTCCCCTAAAGAGACTCTTTTCCAT     |
| 37937<br>(T/C) | Intron | rs3757017 | GGCCCATCCGTCTGCCTGTTTTG<br>CTTCTCATCTCACTTCTACACG<br>AGGG  | GCCTGTGCTCAATTGCTGTTTTCCC<br>CTAAAGAGACTCTTTTCCATAAGTT     |
| 38059<br>(-/+) | Intron | rs4252146 | CTGATCGCATTGCATTTCACTCT<br>GCTGTTGAGTCGATTTTTCTTTA<br>TTTT | TTAGTAACTCCTTGCTCTACAGAGC<br>TTTACCTTCCACATATTTCAGATT      |
| 38202<br>(A/T) | Intron | rs4252147 | TGACTTATCAACATGCTACCATC<br>ATGCACTTCTATCTCTATTCTT<br>CTTC  | TTAAAATTTGGTTCCAATGGCTCA<br>CACCATTATTCTGAGCTATTACCTG      |

|                |        |           |                                                             |                                                         |
|----------------|--------|-----------|-------------------------------------------------------------|---------------------------------------------------------|
| 38206<br>(C/A) | Intron | -         | TTATCAACATGCTACCATCATGC<br>ACTTCCTATCTCTATTCCCTCTTCT<br>TTA | AATTTGGTTCCAAATGGCTCACACC<br>ATTATTCTGAGCTATTACCTGCCTA  |
| 38208<br>(+/-) | Intron | rs4252149 | ATCAACATGCTACCATCATGCA<br>CTTCCTATCTCTATTCCCTCTTCTT<br>TAAA | TTTGGTTCCAAATGGCTCACACCAT<br>TATTCTGAGCTATTACCTGCCTACG  |
| 38210<br>(C/T) | Intron | rs4252150 | CAACATGCTACCATCATGCACTT<br>CCTATCTCTATTCCCTCTTCTTTAA<br>AAT | TGGTTCCAAATGGCTCACACCATTA<br>TTCTGAGCTATTACCTGCCTACGCA  |
| 38220<br>(G/A) | Intron | rs4252151 | CCATCATGCACTTCCTATCTCTA<br>TTCCCTCTTCTTTAAAATTTGGTT<br>CCAA | TGGCTCACACCATTATTCTGAGCTA<br>TTACCTGCCTACGCAGTCTAGAAA   |
| 38570<br>(G/T) | Intron | rs4252152 | GCTCTCCTGTGGACAGGCCATG<br>CCTGTGCCTCCCCAAGCATCGG<br>AAAAA   | TGGCATAGATGGGCCCTTCTCAAAA<br>ATCCCACTCCTGGAGCACTGGCCAA  |
| 38627<br>(C/T) | Intron | rs4252153 | AGATGGGCCCTTCTCAAAAATC<br>CCTCCTGGAGCACTGGCCAA<br>AATTAC    | ACCATCCTGATGCTGGGCTTGCAGT<br>CCTTTCCTTTGGGAATATGAACATG  |
| 38823<br>(C/T) | Exon   | rs4252195 | GGTTTGGAAATGCACTTCTGTGGA<br>GGCACCTTGATATCCCCAGAGT<br>GGGTG | TGACTGCTGCCCACTGCTTGGAGAA<br>GTATGTTTAGGGGACAATTGACATG  |
| 38863<br>(A/C) | Intron | rs4252154 | AGAGTGGGTGTTGACTGCTGCC<br>CACTGCTTGGAGAAGTATGTTTA<br>GGGGA  | AATTGACATGAAGTCTTGTCTTAAA<br>TACTTTTTCTGTCCTTCTTTTCCTC  |
| 39287<br>(G/A) | Intron | rs2859879 | TCATGGCACAGAGGTTACCTGA<br>AGGGGCTGGACCATATTTTCCTC<br>TTGAC  | TCCTCATCTTTTCTAGGTCCCCAAG<br>GCCTtcatcctacaaggctcatcctg |
| 39388<br>(T/G) | Exon   | rs4252196 | ggtgcacaccaagaagtgaatctcgaaccgcatgtt<br>caggaaatagaagt      | tctaggctgttcttgagcccacacgaaaagatattgcctt<br>gctaaagct   |
| 39709<br>(C/T) | Intron | rs4252155 | tggaaaaagagttgaaatgaggtactctgttactccta<br>gaactcacttaa      | gttcaccagttcatacacattcatgatcagagaaCGattc<br>agttattcca  |
| 39744<br>(T/C) | Intron | rs4252156 | ctagaactcacttaaTgttcaccagttcatacacattc<br>atgatcagagaa      | Gattcagttattccaggctgacaattcccccttcatcataat<br>atgtttaa  |



|                |        |           |                                                         |                                                           |
|----------------|--------|-----------|---------------------------------------------------------|-----------------------------------------------------------|
| 39745<br>(A/G) | Intron | rs4252157 | tagaactcacttaaTgttcaccagttcatacacattca<br>tgatcagagaaC  | attcagttattccaggctgacaattcccccttcataataat<br>gtttaag      |
| 39844<br>(C/G) | Intron | rs4252158 | agagaatcatataagactatattgtttcaagcacttt<br>aaaaaccacaa    | atcGagttgggtgctctggtgtgggtgcctgtaatcccagc<br>tacttgggag   |
| 39848<br>(A/G) | Intron | rs4252159 | aatcatataagactatattgtttcaagcactttaaaaa<br>ccacaaGatc    | agttgggtgctctggtgtgggtgcctgtaatcccagctactt<br>gggaggctg   |
| 39964<br>(-/+) | Intron | rs4252160 | ttgagtcccggagtttgaggctgcagtgagttatgat<br>cgtgtcactgcat  | cagcctgggcgacagagtaagacactgtaccaaaaaaa<br>aaaacAccaaaa    |
| 40287<br>(A/G) | Intron | rs4252161 | gctattttaggagaagcaggttgggacaggtgac<br>aaggcacgcagggc    | ctcgtgtgctggtggttctggaagacaggggtcagtg<br>ggacagggat       |
| 40422<br>(A/G) | Intron | rs4252162 | gcctgagctgctctctgggcctggccacaagccca<br>gggcagcttctctg   | gtctgtgaactgaggggtgatgtctgggatgctctgaca<br>ctctagaagg     |
| 40559<br>(C/T) | Intron | rs4252163 | tagctgatctcctctgctccccagtgctctccccgc<br>catcccagcaaa    | gtgcaaatagaagggtccccgttctctcatgatcctcagaga<br>gctgggggtgt |
| 40699<br>(T/C) | Intron | rs4252164 | tggaggagttctctgataggctgatacatttcgagttt<br>agagttcccacc  | cacatccccacaccccaggtctagggcatttagtgctcca<br>ccaggggaacc   |
| 40763<br>(A/C) | Intron | rs4252165 | cccagtgctagggcatttagtgctccaccagggaaac<br>ctgtagagtgagga | gtctgcatgacaggctgggccttctgatgatgctcagaag<br>cagaaagtgt    |
| 41108<br>(C/G) | Intron | rs4252166 | tacaactatggcgtagtaacattcactgaggagggaaa<br>tggaggatccaag | atggagcaagttgctctgggcacacaacacatttgaattt<br>tacagcctc     |
| 41182<br>(-/+) | Intron | rs4252167 | acaacacatttgcaattttacagcctcttggtggcatct<br>cagtcagacat  | tcaatgccctattcgattaatgtaaaaggacacactcagca<br>tgagattcc    |
| 41274<br>(A/G) | Intron | rs4252168 | cacactcagcatgagattccagttgtgcacagaatat<br>acatgagaagtgc  | cctttgtcatccctactttcaaagggtgaaggccaccagcag<br>tatcttgca   |
| 41415<br>(C/T) | Intron | rs4252169 | gtccatagacaaccacaggcaaatgtgagggtgaa<br>actctgtgttctacg  | tgctctgtcagtgaaagcaaggcagtgccagttcagagg<br>gctctggggc     |
| 41494<br>(G/A) | Intron | rs1835346 | ccagttcagagggctctggggcctcaagacagggga<br>tgactggtgtgggt  | ctgcagctgcgagcagagcagtcacaataactgctgat<br>gcttttcttc      |
| 41610<br>(C/T) | Exon   | rs4252170 | actgacaaagtaatcccagcttgtctgcatcccaaa<br>attatgtggtcgc   | gaccggaccgaatgttcatcactggctggggagaaacc<br>caaggtgagat     |
| 41682<br>(A/G) | Intron | rs4252171 | actggctggggagaaacccaaggtgagataaatc<br>cattgcccacataac   | aattggttttgacctacagtccatgtgacaaaatgatctttt<br>ggagaaa     |

|                |             |           |                                                            |                                                            |
|----------------|-------------|-----------|------------------------------------------------------------|------------------------------------------------------------|
| 41867<br>(-/+) | Intron      | -         | aggcacatgatcaaagggaggaaaactgtgtctttg<br>agtctctctctc       | tgtttcagaacatttttattcaattaattaattttaactttatt<br>t          |
| 41975<br>(A/G) | Intron      | rs4252173 | tcaggggtacatgtgcaagtttctgtatatgtaaaca<br>gtggtttgtcat      | cagattatttgtcacctaggtactaacctagtagccaatc<br>ttagtat        |
| 51937<br>(C/A) | Intron      | rs4252197 | agctccccttaacatattagttatgaagatcatagcatt<br>atacaaaaactc    | tgacacaatgatgagtgaaaaaatcaagatgtgaaattttg<br>tgttatgat     |
| 52146<br>(C/G) | Intron      | rs783173  | agcaaaaagtaaagaacaacaaccaaccccaaac<br>caacacgacaaaagcc     | agattgttaattccagggtcaggaacacagaatcatatat<br>gatgtttac      |
| 52296<br>(G/C) | Intron      | rs4252174 | tgcagcctcacagacaggaggtccagtgccgctgc<br>tctGTTCTGGAATAT     | CTCCTGAATGTGTTTTGGGTGCAGT<br>TGCCATTTCTTTCATCTTTTTAAAC     |
| 52484<br>(C/T) | Exon        | rs4252175 | GGAAGAGTCCAATCCACCGAAC<br>TCTGTGCTGGGCATTTGGCCGGA<br>GGCAC | GACAGTTGCCAGGTAAGCAAAGAT<br>CAAGAGACCAAAGTTAGTCTTGTG<br>CT |
| 52553<br>(T/C) | Intron      | rs783172  | AAAGATCAAGAGACCAAAGTTA<br>GTCTTGTGCTCTCTTGTCTCAGT<br>CTCAG | CCCTCAGACTTCATTCCCCAGGTGG<br>CAAATTCAAGGATTTTCAACCGAA<br>G |
| 52814<br>(A/G) | Intron      | rs783171  | GTGGCCAGGGACTAAAGTGGTG<br>ACTTTTCCGGTAGGGAAGGAGG<br>TAGAGG | TACAGGACAGAGACCAACTGCACA<br>CACTTTACTGATGCCCAGGCTAG<br>C   |
| 52888<br>(C/T) | Intron      | rs4252176 | ACACTTTACTGATGCCCAGG<br>CTAGCCCAGTCTAAAGGAAACA<br>CCAACA   | AGGAAGGGATGTGTGCAGGATTCA<br>CAAAGATCTTTTCTACCCCCGGA<br>A   |
| 52932<br>(G/C) | Intron      | rs4252198 | CCAACATAGGAAGGGATGTGTG<br>CAGGATTCACAAAAGATCTTTTC<br>TACCC | CCGAAAAACTAAGTGGTGTGGTT<br>TCGCTAAACAGATTTTGCTAAGTAC<br>T  |
| 53150<br>(T/G) | Exon        | rs11060*  | TAACCCTCACATGCATTTTCTC<br>TCCCTCTGTATAGGGTGACAGTG<br>GAGG  | CCTCTGGTTTGCTTCGAGAAGGACA<br>AATACATTTTACAAGGAGTCACTTC     |
| 53342<br>(A/G) | 3' UTR      | rs6690    | AATTAATTGGACGGGAGACAGA<br>GTGACGCACTGACTCACCTAGA<br>GGCTGG | ACGTGGGTAGGGATTTAGCATGCT<br>GGAAATAACTGGCAGTAATCAAAC<br>GA |
| 53582<br>(-/+) | 3' flanking | rs4252177 | ATTTTGGTTTTGGTCTTCAACAT<br>TTTCATGCTCTTTGTTACCCCA          | TTTTAAATGGGCAGATGGGGGGAT<br>TTAGCTGCTTTTGATAAGGAACAGC      |

|                |             |           | CCAA                                                       | T                                                           |
|----------------|-------------|-----------|------------------------------------------------------------|-------------------------------------------------------------|
| 53783<br>(C/T) | 3' flanking | rs783169  | ACTGTCTTTATTCCTGACACTGA<br>GATGAATGTTTTCAAAGCTGCA<br>ACATG | ATGGGGAGTCATGCGAACCGATTC<br>TGTTATTGGGAATGAAATCTGTCC<br>C   |
| 53798<br>(A/G) | 3' flanking | rs783168  | GACACTGAGATGAATGTTTTCA<br>AAGCTGCAACATGTATGGGGAG<br>TCATGC | AACCGATTCTGTTATTGGGAATGAA<br>ATCTGTCACCGACTGCTTGACTTGA      |
| 53834<br>(A/G) | 3' flanking | rs4252178 | ATGGGGAGTCATGCGAACCGAT<br>TCTGTTATTGGGAATGAAATCTG<br>TCACC | ACTGCTTGACTTGAGCCCAGGGGA<br>CACAGAGCAGAGAGCTGTATATGA<br>TG  |
| 53862<br>(G/A) | 3' flanking | rs783167  | ATTGGGAATGAAATCTGTCACC<br>GACTGCTTGACTTGAGCCCAGG<br>GGACAC | GAGCAGAGAGCTGTATATGATGGA<br>GTGAACCGGTCCATGGATGTGTAA<br>CA  |
| 54072<br>(A/G) | 3' flanking | rs4252179 | TTCCCATGCTAATTGCCTGCCC<br>GGTTTTGAAACAGTCTGCAGTA<br>CACAC  | GTCACAGGAGAATGACCTGTGGGA<br>GAGATACATGTTTAGAAGGAAGAG<br>AA  |
| 54075<br>(G/C) | 3' flanking | rs11902   | CCATTGCTAATTGCCTGCCC<br>TTTGAACAGTCTGCAGTACAC<br>ACGGT     | ACAGGAGAATGACCTGTGGGAGAG<br>ATACATGTTTAGAAGGAAGAGAAA<br>GG  |
| 54078<br>(G/A) | 3' flanking | rs4252180 | TTGCTAATTGCCTGCCC<br>GAAACAGTCTGCAGTACACACG<br>GTCAC       | GGAGAATGACCTGTGGGAGAGATA<br>CATGTTTAGAAGGAAGAGAAAGGA<br>CA  |
| 54137<br>(T/C) | 3' flanking | rs4252199 | ACCTGTGGGAGAGATACATGTT<br>TAGAAGGAAGAGAAAGGACAA<br>Aggcaca | gtttaccatttaaattgttaccaca<br>aaaata                         |
| 54208<br>(T/C) | 3' flanking | rs4252181 | gttaccacaataatccattcaaaatacaat<br>caatgcaacagt             | atcttacagcagagaaatgcagagaaaag<br>caaaactgca<br>agtgactgtga  |
| 54283<br>(C/T) | 3' flanking | rs4252182 | aaaagcaaaactgcaagtgactgtgaataa<br>agggtg<br>aatgtagtctcaaa | cctcaagagctgtgtttatttcattgaca<br>aatagattattgt<br>attcaa    |
| 54925<br>(G/A) | 3' flanking | rs4252200 | atctgtggctctaggtgtccactaaaggagag<br>ccaa<br>aaatgtcccgaata | tctcaggaccacagcatcattttatgaata<br>aacagaaccaag<br>acctcaGat |

\* Genotyped as *LPA* G4481G (rs3189802) by Chretien et al (2006).

## Reference List

- Chretien JP, Coresh J, Berthier-Schaad Y, Kao WH, Fink NE, Klag MJ, Marcovina SM, Giaculli F, Smith MW (2006) Three single-nucleotide polymorphisms in LPA account for most of the increase in lipoprotein(a) level elevation in African Americans compared with European Americans. *J Med Genet* 43:917-923
- Cohen JC, Chiesa G, Hobbs HH (1993) Sequence polymorphisms in the apolipoprotein(a) gene. *J Clin Invest* 91:1630-1636
- Kraft HG, Haibach C, Lingenhel A, Brunner C, Trommsdorff M, Kronenberg F, Muller HJ, Utermann G (1995) Sequence polymorphism in kringle IV 37 in linkage disequilibrium with the apolipoprotein (a) size polymorphism. *Hum Genet* 95:275-282
- Ogorelkova M, Gruber A, Utermann G (1999) Molecular basis of congenital lp(a) deficiency: a frequent apo(a) 'null' mutation in caucasians. *Hum Mol Genet* 8:2087-2096
- Ogorelkova M, Kraft HG, Ehnholm C, Utermann G (2001) Single nucleotide polymorphisms in exons of the apo(a) kringles IV types 6 to 10 domain affect Lp(a) plasma concentrations and have different patterns in Africans and Caucasians. *Hum Mol Genet* 10:815-824
- Prins J, Leus FR, Bouma BN, van Rijn HJ (1999) The identification of polymorphisms in the coding region of the apolipoprotein(a) gene. *Thromb Haemost* 82:1709-1717
- Prins J, Leus FR, van der Hoek YY, Kastelein JJ, Bouma BN, van Rijn HJ (1997) The identification and significance of a Thr--->Pro polymorphism in kringle IV type 8 of apolipoprotein(a). *Thromb Haemost* 77:949-954
- van der Hoek YY, Wittekoek ME, Beisiegel U, Kastelein JJP, Koschinsky ML (1993) The apolipoprotein(a) kringle IV repeats which differ from the major repeat kringle are present in variably sized isoforms. *Hum Mol Genet* 2:361-363
- Wade DP, Clarke JG, Lindahl GE, Liu AC, Zysow BR, Meer K, Schwartz K, Lawn RM (1993) 5' control regions of the apolipoprotein(a) gene and members of the related plasminogen family. *Proc Natl Acad Sci U S A* 90:1369-1373
- Zysow BR, Lindahl GE, Wade DP, Knight BL, Lawn RM (1995) C/T polymorphism in the 5' untranslated region of the apolipoprotein(a) gene introduces an upstream ATG and reduces in vitro translation. *Arterioscler Thromb Vasc Biol* 15:58-64
